# Supplementary material
Source: PubMed Central journal article supplement (PMC7172745)
Supplement: mmc1.pdf [file mmc1.pdf]

# THE LANCET

## Respiratory Medicine

### Supplementary appendix

This appendix formed part of the original submission and has been peer reviewed. We post it as supplied by the authors.

Supplement to: Man WH, van Houten MA, Mérelle ME, et al. Bacterial and viral respiratory tract microbiota and host characteristics in children with lower respiratory tract infections: a matched case-control study. *Lancet Respir Med* 2019; published online March 15. [http://dx.doi.org/10.1016/S2213-2600\(18\)30449-1](http://dx.doi.org/10.1016/S2213-2600(18)30449-1).

1  
2  
3  
4  
5  
6  
7  
8  
9  
10  
11  
12  
13

## Supplementary appendix for

# **Bacterial and viral microbiota, and host characteristics in children with lower respiratory tract infections: results from a matched case-control study**

Wing Ho Man, Marlies A. van Houten, Marieke E. Mérelle, Arine M. Vlieger, Mei Ling J.N. Chu, Nicolaas J.G. Jansen, Elisabeth A.M. Sanders, Debby Bogaert\*

\*Correspondence to: [d.bogaert@ed.ac.uk](mailto:d.bogaert@ed.ac.uk)

### **This PDF file includes:**

Extended Methods

Tables S1 to S5

Figures. S1 to S12

References

## Extended Methods

### Study design PICU cohort

We conducted a prospective study from September 2013 to September 2016 in which patients aged 4 weeks to 5 years who became hospitalized at the pediatric intensive care unit of a Dutch university hospital for a WHO-defined LRTI (acute respiratory symptoms [cough, tachypnea or dyspnea] with clinical signs of LRTI, e.g. abnormal lung auscultation and/or chest radiography)<sup>14</sup> requiring mechanical ventilation were enrolled. Exclusion criteria were a language barrier or severe comorbidity, i.e. congenital heart disease, bronchopulmonary dysplasia, prematurity <32 weeks, cystic fibrosis, sickle-cell disease, immunodeficiency, cardiovascular disease, neuromuscular disease, oncological disease or a severe congenital disorder. Transnasal nasopharyngeal swabs and endotracheal aspirates were obtained within four hours after intubation by trained nurses. All samples were stored immediately in a -20°C freezer followed by transportation on dry ice to a -80°C freezer until further processing.

Data on medical history as well as data on demographic, lifestyle and environmental characteristics were obtained by questionnaires and pharmacy printouts. Clinical data of the cases were obtained from medical charts.

### Study design case-control cohort

Next to the PICU cohort, we conducted a prospective, matched case-control study from September 2013 to September 2016. Patients were enrolled under the same inclusion and exclusion criteria as the PICU cohort and were age-, gender-, and time-matched with healthy controls in a 1:2 ratio. Cases were recruited from three Dutch teaching hospitals. Healthy children were recruited through well-baby clinics and the local municipalities. In addition to the exclusion criteria of the cases, healthy controls were also excluded if the child had fever ( $\geq 38^{\circ}\text{C}$ ) or a respiratory tract infection (except rhinitis) in the previous four weeks, or antibiotic treatment in the previous three months. Transnasal nasopharyngeal swabs were taken of cases generally within 1 hour after admission, and of controls during a home visit within 2 weeks after admission of the matching case by trained nurses and physicians. All samples were directly stored in a -20°C freezer followed by transport on dry ice to a -80°C freezer until further processing. Samples of cases were always stored in the same box as that of their matching controls. Metadata of this cohort was obtained similar to that of the PICU cohort. Both cohorts were registered as one study ([www.trialregister.nl](http://www.trialregister.nl), NTR5132) and were approved by the Dutch National Ethics Committee (NL42019-094-12). Written informed parental consent was obtained from all participants.

### Study size

When we first designed the current studies, there were no previous studies investigating the nasopharyngeal microbiome in children with a LRTI. Little was known about the composition, variability and diversity of the nasopharyngeal microbiota, except for one study performed by our group recruiting 96 children of 18 months of age.<sup>46</sup> We used the data from this study for the sample size calculation of the current studies. We selected four bacterial taxa that were different in abundance and variability. In order to obtain full depth information on power calculation, we selected bacteria with approximately the widest variability in distribution i.e. high and low abundance and high and low variability. We selected two bacterial taxa with high abundance: one with high variability (*Streptococcus*, mean relative abundance 13.1%, standard deviation [SD] 1.6 times the mean) and one with low variability (*Moraxella*, mean abundance 38.5%, SD 0.8 times the mean). In addition, we selected two bacterial taxa with low abundance and high variability (*Prevotella Shahii*, mean abundance 0.3%, SD 6.4 times the mean) and low variability (*Helcococcus*, mean abundance 0.4%, SD 0.9 times the mean). Based on these data and on a p-value of 0.002 (a p-value of 0.05, corrected by Bonferroni for multiple testing because of evaluation of at least top 25 species), we calculated that 150 cases and 300 controls were needed to achieve a sufficient power (80% or more) to detect more than threefold shifts in abundance of bacterial taxa with high abundance and low and high variability. Furthermore, these numbers of cases and controls would obtain a power of 80% to detect more than two-fold shifts in bacterial taxa with low abundance and low variability, and for low abundant bacteria with high variability we would be sufficiently powered to detect eight-fold shifts. A case-control ratio of 1:3 did not significantly improve the power and, therefore, we decided for a 1:2 case-control design to be optimal in our setting.

## 60 Matching factors

61 Regarding matching variables, we decided to match in particular for time because of the findings of the above-  
62 mentioned study that respiratory microbiota profiles varied strongly with season.<sup>46</sup> Our choice for age and sex was  
63 based on several keystone papers reporting that the developing gut microbiota varies across age and sex.<sup>47–49</sup>

## 64 Expert review panel

65 Two expert pediatricians independently classified all cases of the case-control cohort in three major disease  
66 phenotypes, i.e. pneumonia, bronchiolitis, and wheezing illness. Cases with a mixed or unclear phenotype were  
67 deemed mixed. All disagreements were resolved by consensus. The classification of the expert panelists was based  
68 on the entire medical record of the child, including all clinical notes at and during admission, laboratory assessments  
69 and imaging.

## 70 Detection of respiratory viruses and confirmation of bacterial species

71 All samples of cases controls were tested using qualitative multiplex realtime-PCR (RespiFinder® SMARTfast 22)  
72 specific for human bocavirus (BoV), RSV, human influenza virus (IV), parainfluenza virus (PIV), human  
73 rhinoviruses (HRV), adenoviruses (AdV), bocaviruses (BoV), human coronavirus (CoV), and human  
74 metapneumovirus (hMPV; **Supplementary Figure 1**).<sup>50</sup> Identification of *Streptococcus pneumoniae* was done by  
75 quantitative qPCR targeting the autolysin (*lytA*) gene.<sup>51</sup> The *lytA* C<sub>T</sub>-values had a strong correlation with the OTU  
76 annotated as *Streptococcus pneumoniae* (3) confirming its origin (Pearson's  $r=0.82$ ,  $p<0.001$ ). In addition, we  
77 performed a multiplex qPCR (Fast Track Diagnostics) to confirm or further nuance the OTUs annotated as  
78 *Staphylococcus*, *Moraxella* or *Haemophilus*. We found that the OTU annotated as *S. aureus/epidermidis* (7) was  
79 significantly related with the *S. aureus* C<sub>T</sub>-values (Pearson's  $r=-0.34$ ,  $p<0.001$ ) and that the OTU annotated as *M.*  
80 *catarrhalis/nonliquefaciens* (1) was significantly related with the *M. catarrhalis* C<sub>T</sub>-values (Pearson's  $r=-0.51$ ,  
81  $p<0.001$ ). We therefore did not change their original annotation. The OTU annotated as *H. haemolyticus* (2) was  
82 significantly related with the *H. influenzae* C<sub>T</sub>-values (Pearson's  $r=-0.71$ ,  $p<0.001$ ); therefore, we changed its  
83 annotation into *H. influenzae/haemolyticus* (2).

## 84 16S rRNA gene amplification and sequencing

85 Bacterial DNA was isolated from samples and quantified as previously described.<sup>33,52</sup> In short, an aliquot of 200µl  
86 of each sample was added to 650µl lysis buffer with 0.1 mm zirconium beads and 550µl phenol. All samples were  
87 mechanically lysed with a bead beater procedure. Almost all samples fulfilled our quality control standards for  
88 reliable analyses, having DNA levels of  $\geq 0.3$  pg/µl over negative controls (>98%, **Supplementary Figure 1**).  
89 Amplification of the V4 hypervariable region of the 16S rRNA gene was performed using barcoded universal primer  
90 pair 533F/806R. Amplicons were quantified by PicoGreen (ThermoFisher) and pooled in equimolar amounts.  
91 Amplicon pools of samples and controls were sequenced in five Illumina MiSeq runs (San Diego, CA, USA).  
92 Samples from cases were always processed simultaneously with that of their matching controls to uphold identical  
93 storage and processing conditions within each of the case-control sets.

## 94 Bioinformatics analysis

95 Raw sequences were trimmed using an adaptive, window-based trimming algorithm (Sickle,  $Q>20$ , length threshold  
96 of 150 nucleotides).<sup>53</sup> We aimed to further reduce the number of sequence errors in the reads by applying an error  
97 correction algorithm (BayesHammer, SPAdes genome assembler toolkit).<sup>54</sup> Forward and reverse reads were then  
98 assembled into contigs using PANDaseq.<sup>55</sup> Merged reads were demultiplexed using QIIME v1.9.<sup>56</sup> After removal  
99 of singleton sequences, we removed chimeras using both *de novo* and reference (against Gold database) chimera  
100 identification (UCHIME algorithm in VSEARCH).<sup>57,58</sup> VSEARCH abundance-based greedy clustering was used to  
101 pick OTUs at a 97% identity threshold.<sup>59</sup> Taxonomic annotation was executed using the RDP-II naïve Bayesian  
102 classifier on SILVA v119 training set.<sup>60</sup> Taxonomic assignment was validated by blasting against the NCBI database,  
103 using a 100% identity cut-off. After aligning the node representative sequences to the Silva v119 core alignment  
104 database using the PyNAST method,<sup>61</sup> a rooted phylogenetic tree was calculated using FastTree.<sup>62</sup> Two samples were

below our threshold of 15,000 reads/sample and were therefore excluded from further analysis (**Supplementary Figure 1**). Removing these left 33,020,647 reads in total (mean  $63,945 \pm 26,270$  reads/sample). The Good's estimator of all samples was above 99.9% and rarefaction curves on raw count data approached plateau (**Supplementary Figure 12**), indicating that the coverage degree of our sequencing was very high.<sup>63</sup> We generated an abundance-filtered dataset by including only those OTUs that were present at or above a confidence level of detection (0.1% relative abundance) in at least 2 samples, retaining 306 OTUs in total.<sup>64</sup> To avoid OTUs with identical annotations, we refer to OTUs using their taxonomical annotations combined with a rank number based on the abundance of each given OTU. The raw OTU-counts table was used for calculations of local diversity ( $\alpha$ -diversity) and analyses using the *metagenomeSeq* package.<sup>65</sup> The OTU-proportions table was used for all other downstream analyses, including hierarchical clustering and random forest modelling. Moreover, the Bray-Curtis (dis)similarity metric was consistently used to express ecological distance ( $\beta$ -diversity) in all analyses because it includes proportional abundance information and excludes joint-absence information, and thereby yields useful insights into the specific structure of our data.<sup>66</sup>

### Quality control of 16S rRNA gene amplicon sequencing

In total, we had 34 negative controls during DNA isolation. The DNA load of these DNA isolation blanks were two orders of magnitude lower compared to the samples analyzed in this study (median 0.26 vs 49.7 pg/ $\mu$ l; (**Supplementary Figure 13A**). In addition, 14 DNA isolation and PCR blanks were sequenced along with the study samples. All blanks yielded <15,000 reads and the number of reads was at least one orders of magnitude lower compared to that of the samples (median 4,618 vs 67,276 reads; **Supplementary Figure 13B**). There were no taxa shared across all blanks. Total microbiota community of blanks were highly diverse from samples (*adonis*  $R^2=9.1\%$ ,  $p<0.001$ ) and hierarchical clustering clearly separated the blanks (**Supplementary Figure 13C**). These results robustly indicate that our strict sequencing protocol resulted in no apparent contamination. However, to ensure our data was of the highest quality, we used the bacterial biomass to identify and remove contaminants. We identified 13 OTUs as contaminating species when relating the frequency of each OTU to the bacterial biomass of the samples (**Supplementary Figure 14** and **Supplementary Table 5**). In addition, we used the Decontam R-package to additionally identify 8 OTUs as contaminants by evaluating the prevalence (presence/absence across samples) of each OTU in true positive samples compared to the prevalence in negative controls.<sup>29,30</sup> These 21 OTUs were removed from our dataset prior to all analyses.

### Statistical analysis

Data analysis was performed in R v3.2<sup>67</sup> within R studio v1.0.<sup>68</sup> All analyses assessing matched samples accounted for the matched nature of the samples. Our questionnaires contained minimal missing data (<1%), allowing analyses of individuals with complete data on all variables required for a particular analysis. A P-value of less than 0.05 or a Benjamini-Hochberg (BH) adjusted q less than 0.05 was considered statistically significant.

To compare baseline characteristics and viral detection between cases and controls, we used conditional logistic regression analysis.

To assess the concordance between the bacterial microbiota of the nasopharynx with that of endotracheal aspirates, we compared the intra-individual and inter-individual Bray-Curtis similarity. The Bray-Curtis similarity was calculated using the formula:  $1 - \text{Bray-Curtis dissimilarity}$ . Statistical significance was determined using Wilcoxon rank-sum test.

Nonmetric multidimensional scaling (NMDS) plots based on Bray-Curtis dissimilarity were used to visualize differences of total microbiota communities and statistical significance was calculated by *adonis* (*vegan*, 1,999 permutations). Because there was substantial multicollinearity (*vif.cca*-function; two covariates were aliased; range variance inflation factor of other covariates, 1.1 - 8.8) between some of the covariates, we performed a stepwise

selected multivariable distance-based redundancy analysis (*ordiR2step*, 1,999 permutations).<sup>69,70</sup> Directionality of these covariates were projected in NMDS plots using *envfit* (*vegan*).

Unsupervised average linkage hierarchical clustering was performed as described previously (*hclust* and *vegdist*, *vegan* package).<sup>13</sup> The optimal number of clusters contained in the microbiota dataset was determined based on Silhouette and Calinski-Harabasz indices (*cluster.stats*, *fpc* package). Clusters including less than five individuals were excluded for further downstream analysis. Random forest classifier analyses was performed to determine biomarker species and factors that most discriminate between clusters by the interpretation step of the two-stage feature selection procedure of *VSURF* (10,000 trees each iteration, with 100 thresholding iterations and 50 interpretation iterations).<sup>71</sup> A chi-square test was used to test for the association between clusters and presence/absence of acute disease.

We used *metagenomeSeq* to identify specific microbial taxa associated with cases or controls (filtered on taxa present in >5% of the samples, 100 maximum iterations, mixed model design).<sup>65</sup> In addition, using a 10-fold cross-validated *VSURF* procedure we performed random forest classifier analysis to determine which microbial taxa best distinguish disease from health. Taxa that were selected at least 1 time during the interpretation step, were deemed minor classifier taxa, while taxa that were selected 9 or 10 times were defined as major classifier taxa. Variable importance was estimated by calculating the mean decrease in Gini after randomly permuting the values of each given variable (*randomForest*, 10,000 trees, 100 replicates).<sup>72</sup>

A similar random forest classifier analysis was performed including not only the bacterial abundance data but also viral presence and metadata of host and lifestyle/environmental factors. Variable importance was estimated by calculating the mean importance after randomly permuting the values of each selected variable (100 replicates, *caret* package).<sup>73</sup> The direction of the variable associations was crudely estimated *post-hoc* using the point biserial correlation coefficients, where the relative abundances of bacterial taxa were transformed with the arcsine square-root transformation for proportional data. Performance of the sparse random forest models was evaluated by calculating the area under the ROC curve (AUC) using the out-of-bag predictions for classification (*pROC* package)<sup>74</sup> as previously described.<sup>75</sup> Using the above procedures, we also build a sparse random forest prediction model to investigate to what extent hospitalization duration could be predicted with all available data. Predictions were determined by a cross-validated random forest procedure (*train* function, 10 folds, 100 iterations, *caret* package).<sup>73</sup> The individual association of these duration-predictive variables with hospitalization duration is depicted as a heatmap of their mean values against short (1-3 days,  $\leq 33^{\text{rd}}$  percentile), medium (4-5 days,  $\leq 67^{\text{th}}$  percentile) and long (>5 days,  $>67^{\text{th}}$  percentile) hospitalization, except for disease phenotype as this is a categorical variable. Colours of the heatmap correspond with row wise normalized values (i.e. white indicates the overall minimum value of a variable, purple indicates the overall maximum value).

Above analyses were carried out for the entire case-control cohort and were in part repeated for each of the phenotypes independently. Additionally, to study the role of nasopharyngeal microbiota in the disease severity, we stratified the cases according to the physicians' judgment whether antibiotics were needed during admission and performed separate analyses on both groups. Finally, a subset of these analyses was performed in the assessment of the concordance between nasopharyngeal and endotracheal samples of the PICU cohort, as well as in the comparison of the PICU cohort nasopharyngeal microbiota with that of age and season-matched participants of the case-control cohort.

### Data availability

Sequence data that support the findings of this study have been deposited in the NCBI Sequence Read Archive (SRA) database with BioProject ID PRJNA428382.

**Table S1. Baseline characteristics and clinical data for the PICU cohort.**

Data on medication use was acquired by pharmacy printouts, whereas the rest of the data was acquired by parent questionnaires. Breastfeeding was nonexclusive. Educational level was classified into three categories: low level (primary school education or pre-vocational education as highest qualification), intermediate (selective secondary education or vocational education) and high level (university of applied sciences and research university). Smoke exposure included children who were exposed to second-hand tobacco smoke. P values were determined by univariate conditional logistic regression. IQR = interquartile range; RTI = respiratory tract infection; LRTI = any parental-reported lower RTI.

|                                            | <b>PICU cohort</b> |
|--------------------------------------------|--------------------|
| n                                          | 29                 |
| <b>Basics</b>                              |                    |
| Girl (%)                                   | 14 (48.3)          |
| Age (months) (median [IQR])                | 2.2 [1.6, 3.6]     |
| Born at term (%)                           | 20 (74.1)          |
| Mode of delivery (%)                       |                    |
| vaginal                                    | 18 (66.7)          |
| elective C-section                         | 3 (11.1)           |
| emergency C-section                        | 6 (22.2)           |
| Season of sampling (%)                     |                    |
| Spring                                     | 7 (24.1)           |
| Summer                                     | 3 (10.3)           |
| Autumn                                     | 1 (3.4)            |
| Winter                                     | 18 (62.1)          |
| <b>Medical History</b>                     |                    |
| LRTI (%)                                   | 2 (14.3)           |
| Wheezing (%)                               | 3 (10.3)           |
| Otitis (%)                                 | 1 (3.4)            |
| Hospitalization for RTI (%)                | 2 (14.3)           |
| <b>Medication</b>                          |                    |
| Antibiotics past 6 months (%)              | 3 (12.5)           |
| <b>Feeding</b>                             |                    |
| Breastfeeding current and/or >3 months (%) | 10 (37.0)          |
| <b>Family</b>                              |                    |
| Education level parents (%)                |                    |
| high                                       | 17 (63.0)          |
| intermediate                               | 8 (29.6)           |
| low                                        | 2 (7.4)            |
| Siblings (median [IQR])                    | 1.0 [1.0, 2.0]     |
| <b>Environment</b>                         |                    |
| Smoke exposure (%)                         | 16 (55.2)          |
| <b>Clinical data</b>                       |                    |
| Chest x-ray abnormality (%)                | 29 (100)           |
| Positive blood culture (%)                 | 1 (3.4)            |
| Positive endotracheal aspirate culture (%) | 15 (51.7)          |
| Antibiotic treatment prior to sampling (%) | 5 (17.2)           |
| Antiviral treatment prior to sampling (%)  | 0 (0)              |
| Vasopressor support (%)                    | 3 (10.3)           |

199  
200  
201**Table S2. Baseline characteristics and clinical data for the case cohort stratified by phenotype.**

<sup>1</sup> = Respiratory rate >40 breaths/min for infants <1 year; >35 breaths/min for children 1-2 years; >30/min for older children. IQR = interquartile range.

|                                                              | <b>Pneumonia</b>   | <b>Bronchiolitis</b> | <b>Wheezing illness</b> | <b>Mixed</b>      |
|--------------------------------------------------------------|--------------------|----------------------|-------------------------|-------------------|
| <b>n</b>                                                     | 37                 | 57                   | 34                      | 26                |
| <b>Basics</b>                                                |                    |                      |                         |                   |
| Girl (%)                                                     | 14 (37.8)          | 25 (43.9)            | 9 (26.5)                | 13 (50.0)         |
| Age (months) (median [IQR])                                  | 26.1 [16.4, 37.4]  | 4.9 [2.5, 10.1]      | 23.3 [15.7, 34.1]       | 9.6 [4.5, 18.9]   |
| Born at term (%)                                             | 35 (94.6)          | 53 (93.0)            | 31 (91.2)               | 23 (88.5)         |
| Mode of delivery (%)                                         |                    |                      |                         |                   |
| vaginal                                                      | 29 (78.4)          | 44 (77.2)            | 26 (76.5)               | 25 (96.2)         |
| elective C-section                                           | 5 (13.5)           | 6 (10.5)             | 3 (8.8)                 | 1 (3.8)           |
| emergency C-section                                          | 3 (8.1)            | 7 (12.3)             | 5 (14.7)                | 0 (0.0)           |
| Season of sampling (%)                                       |                    |                      |                         |                   |
| Spring                                                       | 13 (36.1)          | 17 (29.8)            | 11 (32.4)               | 8 (30.8)          |
| Summer                                                       | 4 (11.1)           | 3 (5.3)              | 9 (26.5)                | 6 (23.1)          |
| Autumn                                                       | 1 (2.8)            | 1 (1.8)              | 5 (14.7)                | 1 (3.8)           |
| Winter                                                       | 18 (50.0)          | 36 (63.2)            | 9 (26.5)                | 11 (42.3)         |
| <b>CLINICAL DATA</b>                                         |                    |                      |                         |                   |
| <b>Symptoms at admission</b>                                 |                    |                      |                         |                   |
| Duration of symptoms (days) (median [IQR])                   | 3.0 [2.0, 5.0]     | 3.0 [1.8, 6.0]       | 2.0 [1.0, 2.0]          | 3.0 [2.0, 5.0]    |
| Cough (%)                                                    | 29 (78.4)          | 49 (86.0)            | 28 (82.4)               | 24 (92.3)         |
| Wheeze (%)                                                   | 2 (5.4)            | 9 (15.8)             | 12 (35.3)               | 3 (11.5)          |
| Common cold (%)                                              | 19 (51.4)          | 38 (66.7)            | 24 (70.6)               | 23 (88.5)         |
| Respiratory distress (%)                                     | 20 (54.1)          | 45 (78.9)            | 31 (91.2)               | 21 (80.8)         |
| Feeding difficulty (%)                                       | 23 (62.2)          | 38 (66.7)            | 9 (26.5)                | 10 (38.5)         |
| <b>Clinical findings at admission</b>                        |                    |                      |                         |                   |
| Tachypnea <sup>1</sup> (%)                                   | 23 (62.2)          | 41 (71.9)            | 27 (79.4)               | 18 (69.2)         |
| Oxygen saturation (median [IQR])                             | 95.0 [93.0, 96.0]  | 95.0 [94.0, 98.0]    | 94.5 [91.2, 96.0]       | 95.0 [92.2, 98.8] |
| Fever at home or during presentation (%)                     | 36 (97.3)          | 43 (75.4)            | 21 (61.8)               | 16 (61.5)         |
| Temperature (°C) (median [IQR])                              | 39.2 [38.2, 39.8]  | 38.3 [37.7, 39.1]    | 37.8 [37.4, 38.5]       | 38.1 [37.4, 39.0] |
| Nasal flaring (%)                                            | 10 (27.0)          | 17 (29.8)            | 7 (20.6)                | 4 (15.4)          |
| Chest retractions (%)                                        | 20 (54.1)          | 44 (77.2)            | 31 (91.2)               | 16 (61.5)         |
| Grunting (%)                                                 | 12 (32.4)          | 11 (19.3)            | 7 (20.6)                | 3 (11.5)          |
| Auscultatory abnormalities (%)                               | 35 (94.6)          | 55 (96.5)            | 34 (100.0)              | 25 (96.2)         |
| Ronchi (%)                                                   | 9 (24.3)           | 38 (66.7)            | 13 (38.2)               | 15 (57.7)         |
| Wheezing (%)                                                 | 5 (13.5)           | 24 (42.1)            | 30 (88.2)               | 17 (65.4)         |
| Creptitations (%)                                            | 29 (78.4)          | 29 (50.9)            | 8 (23.5)                | 8 (30.8)          |
| Decreased breath sounds (%)                                  | 10 (27.0)          | 3 (5.3)              | 13 (38.2)               | 5 (19.2)          |
| <b>Radiology</b>                                             |                    |                      |                         |                   |
| Endpoint consolidation (%)                                   | 16 (43.2)          | 2 (3.5)              | 2 (5.9)                 | 1 (3.8)           |
| Non-endpoint consolidation (%)                               | 9 (24.3)           | 4 (7.0)              | 3 (8.8)                 | 6 (23.1)          |
| No chest x-ray abnormality (%)                               | 3 (8.1)            | 4 (7.0)              | 3 (8.8)                 | 2 (7.7)           |
| Chest x-ray not performed (%)                                | 10 (27.0)          | 47 (82.5)            | 27 (79.4)               | 18 (69.2)         |
| <b>Laboratory</b>                                            |                    |                      |                         |                   |
| Blood tests (%)                                              | 22 (59.5)          | 18 (31.6)            | 2 (5.9)                 | 4 (15.4)          |
| White blood cell count (x 10 <sup>9</sup> /L) (median [IQR]) | 13.8 [11.2, 17.6]  | 14.8 [9.8, 17.4]     | 11.1 [10.5, 11.6]       | 13.5 [9.7, 18.2]  |
| CRP (mg/L) (median [IQR])                                    | 27.0 [17.0, 138.0] | 17.0 [7.0, 37.0]     | 19.0 [19.0, 19.0]       | 22.0 [12.5, 55.2] |
| Blood culture (all negative) (%)                             | 10 (27.0)          | 2 (3.5)              | 0 (0.0)                 | 0 (0.0)           |
| <b>Treatment</b>                                             |                    |                      |                         |                   |
| Hospitalization duration (days) (median [IQR])               | 4.0 [3.0, 5.0]     | 5.0 [3.0, 7.0]       | 3.0 [3.0, 4.0]          | 3.0 [2.2, 5.0]    |
| Supplemental oxygen (%)                                      | 26 (70.3)          | 42 (73.7)            | 20 (58.8)               | 12 (46.2)         |
| Supplemental oxygen duration (days) (median [IQR])           | 3.0 [2.0, 4.0]     | 4.0 [3.0, 4.8]       | 2.0 [1.8, 3.0]          | 4.0 [2.0, 4.0]    |
| Antibiotic treatment during admission (%)                    | 29 (78.4)          | 4 (7.0)              | 4 (11.8)                | 6 (23.1)          |
| Albuterol (%)                                                | 10 (27.0)          | 26 (45.6)            | 34 (100.0)              | 15 (57.7)         |
| Prednisone (%)                                               | 2 (5.4)            | 0 (0.0)              | 18 (52.9)               | 5 (19.2)          |
| Nasogastric tube feeding (%)                                 | 10 (27.0)          | 27 (47.4)            | 0 (0.0)                 | 3 (11.5)          |
| <b>Follow Up</b>                                             |                    |                      |                         |                   |
| Follow up sampling (days after discharge) (median [IQR])     | 40.0 [36.0, 46.0]  | 41.5 [34.8, 46.2]    | 39.0 [35.2, 43.5]       | 42.0 [36.0, 50.8] |
| New episode of respiratory complaints (%)                    | 18 (52.9)          | 36 (64.3)            | 25 (73.5)               | 18 (69.2)         |

202

203



**Table S3. STROBE Statement.**

|                              | <b>Item No</b> | <b>Recommendation</b>                                                                                                                                                                | <b>Comment</b>                                                                                                                                                                                                                                       |
|------------------------------|----------------|--------------------------------------------------------------------------------------------------------------------------------------------------------------------------------------|------------------------------------------------------------------------------------------------------------------------------------------------------------------------------------------------------------------------------------------------------|
| <b>Title and abstract</b>    | 1              | (a) Indicate the study's design with a commonly used term in the title or the abstract                                                                                               | Indicated in both title and abstract                                                                                                                                                                                                                 |
|                              |                | (b) Provide in the abstract an informative and balanced summary of what was done and what was found                                                                                  | Provided in abstract                                                                                                                                                                                                                                 |
| <b>Introduction</b>          |                |                                                                                                                                                                                      |                                                                                                                                                                                                                                                      |
| Background/rationale         | 2              | Explain the scientific background and rationale for the investigation being reported                                                                                                 | Explained in Introduction, paragraphs 1-4                                                                                                                                                                                                            |
| Objectives                   | 3              | State specific objectives, including any prespecified hypotheses                                                                                                                     | Stated in Introduction, paragraph 4                                                                                                                                                                                                                  |
| <b>Methods</b>               |                |                                                                                                                                                                                      |                                                                                                                                                                                                                                                      |
| Study design                 | 4              | Present key elements of study design early in the paper                                                                                                                              | Presented in Abstract, sub-section "Methods", and in Methods, first sub-section "Study design and procedures"                                                                                                                                        |
| Setting                      | 5              | Describe the setting, locations, and relevant dates, including periods of recruitment, exposure, follow-up, and data collection                                                      | Described in Methods, first sub-section "Study design and procedures", and in Extended Methods, sub-sections "Study design PICU cohort" and "Study design case-control cohort"                                                                       |
| Participants                 | 6              | (a) Give the eligibility criteria, and the sources and methods of case ascertainment and control selection. Give the rationale for the choice of cases and controls                  | Described in Methods, sub-section "Study design and procedures", and in Extended Methods, sub-sections "Study design PICU cohort", "Study design case-control cohort", and "Matching factors"                                                        |
|                              |                | (b) For matched studies, give matching criteria and the number of controls per case                                                                                                  | Described in Methods, sub-section "Study design and procedures", and in Extended Methods, sub-sections "Study design case-control cohort" and "Matching factors"                                                                                     |
| Variables                    | 7              | Clearly define all outcomes, exposures, predictors, potential confounders, and effect modifiers. Give diagnostic criteria, if applicable                                             | Described in Methods and Extended Methods, sub-section "Statistical analysis"                                                                                                                                                                        |
| Data sources/<br>measurement | 8*             | For each variable of interest, give sources of data and details of methods of assessment (measurement). Describe comparability of assessment methods if there is more than one group | Described in Methods, sub-section "Microbiota analysis", and in Extended Methods, sub-sections "Detection of respiratory viruses and confirmation of bacterial species", "16S rRNA gene amplification and sequencing", and "Bioinformatics analysis" |
| Bias                         | 9              | Describe any efforts to address potential sources of bias                                                                                                                            | Described in Methods, sub-section "Study design and procedures", and in Extended Methods, sub-sections "Study                                                                                                                                        |

|                        |     |                                                                                                                                                                                                   |                                                                                                                                                                                                                                                                       |
|------------------------|-----|---------------------------------------------------------------------------------------------------------------------------------------------------------------------------------------------------|-----------------------------------------------------------------------------------------------------------------------------------------------------------------------------------------------------------------------------------------------------------------------|
|                        |     |                                                                                                                                                                                                   | design case-control cohort” and “Matching factors”                                                                                                                                                                                                                    |
| Study size             | 10  | Explain how the study size was arrived at                                                                                                                                                         | Described in Extended Methods, sub-section “Study size”                                                                                                                                                                                                               |
| Quantitative variables | 11  | Explain how quantitative variables were handled in the analyses. If applicable, describe which groupings were chosen and why                                                                      | Described in Methods and Extended Methods, sub-section “Statistical analysis”                                                                                                                                                                                         |
| Statistical methods    | 12  | (a) Describe all statistical methods, including those used to control for confounding                                                                                                             | Described in Methods and Extended Methods, sub-section “Statistical analysis”                                                                                                                                                                                         |
|                        |     | (b) Describe any methods used to examine subgroups and interactions                                                                                                                               | Described in Methods and Extended Methods, sub-section “Statistical analysis”                                                                                                                                                                                         |
|                        |     | (c) Explain how missing data were addressed                                                                                                                                                       | Described in Extended Methods, first paragraph of sub-section “Statistical analysis”                                                                                                                                                                                  |
|                        |     | (d) If applicable, explain how matching of cases and controls was addressed                                                                                                                       | Described in Methods and Extended Methods, sub-section “Statistical analysis”                                                                                                                                                                                         |
|                        |     | (e) Describe any sensitivity analyses                                                                                                                                                             | na                                                                                                                                                                                                                                                                    |
| <b>Results</b>         |     |                                                                                                                                                                                                   |                                                                                                                                                                                                                                                                       |
| Participants           | 13* | (a) Report numbers of individuals at each stage of study—eg numbers potentially eligible, examined for eligibility, confirmed eligible, included in the study, completing follow-up, and analysed | Described in Methods, sub-section “Study design and procedures”, paragraphs 1-2; Extended Methods, sub-sections “Detection of respiratory viruses and confirmation of bacterial species” and “16S rRNA gene amplification and sequencing”; and Supplementary Figure 1 |
|                        |     | (b) Give reasons for non-participation at each stage                                                                                                                                              | Described in Methods, sub-section “Study design and procedures”, paragraphs 1-2; Extended Methods, sub-sections “Detection of respiratory viruses and confirmation of bacterial species” and “16S rRNA gene amplification and sequencing”; and Supplementary Figure 1 |
|                        |     | (c) Consider use of a flow diagram                                                                                                                                                                | Supplementary Figure 1                                                                                                                                                                                                                                                |
| Descriptive data       | 14* | (a) Give characteristics of study participants (eg demographic, clinical, social) and information on exposures and potential confounders                                                          | Described in Methods, sub-section “Study design and procedures”, paragraphs 1-2; Results, sub-section “Host, lifestyle and environmental factors are associated with risk of disease”; Table 1; and Supplementary Table 1                                             |
|                        |     | (b) Indicate number of participants with missing data for each variable of interest                                                                                                               | na                                                                                                                                                                                                                                                                    |

|                          |     |                                                                                                                                                                                                              |                                                                                                                                                                                                                                                              |
|--------------------------|-----|--------------------------------------------------------------------------------------------------------------------------------------------------------------------------------------------------------------|--------------------------------------------------------------------------------------------------------------------------------------------------------------------------------------------------------------------------------------------------------------|
| Outcome data             | 15* | Report numbers in each exposure category, or summary measures of exposure                                                                                                                                    | Described in Results, sub-sections “Viral and bacterial profile differences between cases and controls” and “Clinical presentation independent viral and bacterial differences between cases and controls”                                                   |
| Main results             | 16  | (a) Give unadjusted estimates and, if applicable, confounder-adjusted estimates and their precision (eg, 95% confidence interval). Make clear which confounders were adjusted for and why they were included | Described in Results, sub-sections “Nasopharyngeal microbiota profiles correlate with lower respiratory tract microbiota during childhood LRTI”, “Viral and bacterial profile differences between cases and controls”, and “Combined importance for disease” |
|                          |     | (b) Report category boundaries when continuous variables were categorized                                                                                                                                    | na                                                                                                                                                                                                                                                           |
|                          |     | (c) If relevant, consider translating estimates of relative risk into absolute risk for a meaningful time period                                                                                             | na                                                                                                                                                                                                                                                           |
| Other analyses           | 17  | Report other analyses done—eg analyses of subgroups and interactions, and sensitivity analyses                                                                                                               | Described in Results, sub-sections “Clinical presentation independent viral and bacterial differences between cases and controls” and “Microbiota and severity of disease”                                                                                   |
| <b>Discussion</b>        |     |                                                                                                                                                                                                              |                                                                                                                                                                                                                                                              |
| Key results              | 18  | Summarise key results with reference to study objectives                                                                                                                                                     | Described in Discussion, paragraphs 1-2                                                                                                                                                                                                                      |
| Limitations              | 19  | Discuss limitations of the study, taking into account sources of potential bias or imprecision. Discuss both direction and magnitude of any potential bias                                                   | Described in Discussion, paragraph 8                                                                                                                                                                                                                         |
| Interpretation           | 20  | Give a cautious overall interpretation of results considering objectives, limitations, multiplicity of analyses, results from similar studies, and other relevant evidence                                   | Described in Discussion, paragraphs 4-6                                                                                                                                                                                                                      |
| Generalisability         | 21  | Discuss the generalisability (external validity) of the study results                                                                                                                                        | Described in Discussion, paragraph 5 and 8                                                                                                                                                                                                                   |
| <b>Other information</b> |     |                                                                                                                                                                                                              |                                                                                                                                                                                                                                                              |
| Funding                  | 22  | Give the source of funding and the role of the funders for the present study and, if applicable, for the original study on which the present article is based                                                | Described in Abstract, sub-section “Funding”, and in Methods, sub-section “Role of funding source”                                                                                                                                                           |

\*Give information separately for cases and controls.

207  
208  
209**Table S4. Summary of intra-individual concordance between the microbiota of the nasopharynx and the lower respiratory tract for the PICU-subcohorts stratified by suspicion or confirmation of bacterial infection and of the cohort excluding the PICU cases that received antibiotics prior to sampling.**

|                                    | <b>Suspected</b> | <b>Not suspected</b> | <b>Confirmed</b> | <b>Not confirmed</b> | <b>No prior ABx</b> |
|------------------------------------|------------------|----------------------|------------------|----------------------|---------------------|
| <b>Viral presence</b>              |                  |                      |                  |                      |                     |
| Mean agreement                     | 97%              | 95%                  | 97%              | 95%                  | 96%                 |
| (95% CI)                           | 93-100%          | 88-100%              | 93-100%          | 90-100%              | 93-100%             |
| <b>Shannon diversity</b>           |                  |                      |                  |                      |                     |
| Pearson's r                        | 0.59             | 0.71                 | 0.54             | 0.73                 | 0.59                |
| p-value                            | 0.01             | 0.07                 | 0.04             | 0.02                 | 0.008               |
| <b>Bray Curtis similarity</b>      |                  |                      |                  |                      |                     |
| Intra-individual                   | 0.59             | 0.68                 | 0.68             | 0.48                 | 0.60                |
| Inter-individual                   | 0.13             | 0.04                 | 0.17             | 0.06                 | 0.14                |
| p-value                            | <0.001           | <0.001               | <0.001           | <0.001               | <0.001              |
| <b>Correlated taxa (p&lt;0.05)</b> |                  |                      |                  |                      |                     |
| Number                             | 45               | 51                   | 48               | 42                   | 65                  |
| Combined relative abundance        | 70%              | 77%                  | 69%              | 61%                  | 78.6%               |
| Median Pearson's r                 | 0.95             | 1.0                  | 0.96             | 0.98                 | 0.81                |
| IQR                                | 0.74-1.0         | 0.94-1.0             | 0.79-0.99        | 0.79-1.0             | 0.59-1.00           |

210

211 **Table S5. Potential contaminants.**

212 OTUs were identified as potential contaminants based on their relation with bacterial biomass (Frequency) or their  
 213 presence/absence in samples vs. controls (Prevalence).

| <b>OTU</b>                             | <b>Method</b> |
|----------------------------------------|---------------|
| <i>Tepidimonas</i> (28)                | Both          |
| <i>Schlegelella</i> (10)               | Both          |
| <i>Acidovorax</i> (66)                 | Both          |
| <i>Vogesella</i> (69)                  | Both          |
| <i>Acinetobacter</i> (31)              | Both          |
| <i>Acinetobacter seohaensis</i> (64)   | Both          |
| <i>Phyllobacteriaceae</i> (52)         | Both          |
| <i>Pseudomonas stutzeri</i> (95)       | Both          |
| <i>Tardiphaga robiniae</i> (106)       | Both          |
| <i>Mesorhizobium</i> (81)              | Both          |
| <i>Shewanella</i> (30)                 | Both          |
| <i>Massilia</i> (88)                   | Frequency     |
| <i>Pseudomonas aeruginosa</i> (79)     | Frequency     |
| <i>Rhizobiales</i> (169)               | Prevalence    |
| <i>Xanthomonadales</i> (114)           | Prevalence    |
| <i>Cyanobacteria</i> (126)             | Prevalence    |
| <i>Hydrotalea</i> (205)                | Prevalence    |
| <i>Cyanobacteria</i> (143)             | Prevalence    |
| <i>Acinetobacter</i> (139)             | Prevalence    |
| <i>Modestobacter</i> (167)             | Prevalence    |
| <i>Cupriavidus metallidurans</i> (156) | Prevalence    |

214

215

216 **Figure S1. Flow diagram for subject enrolment.**

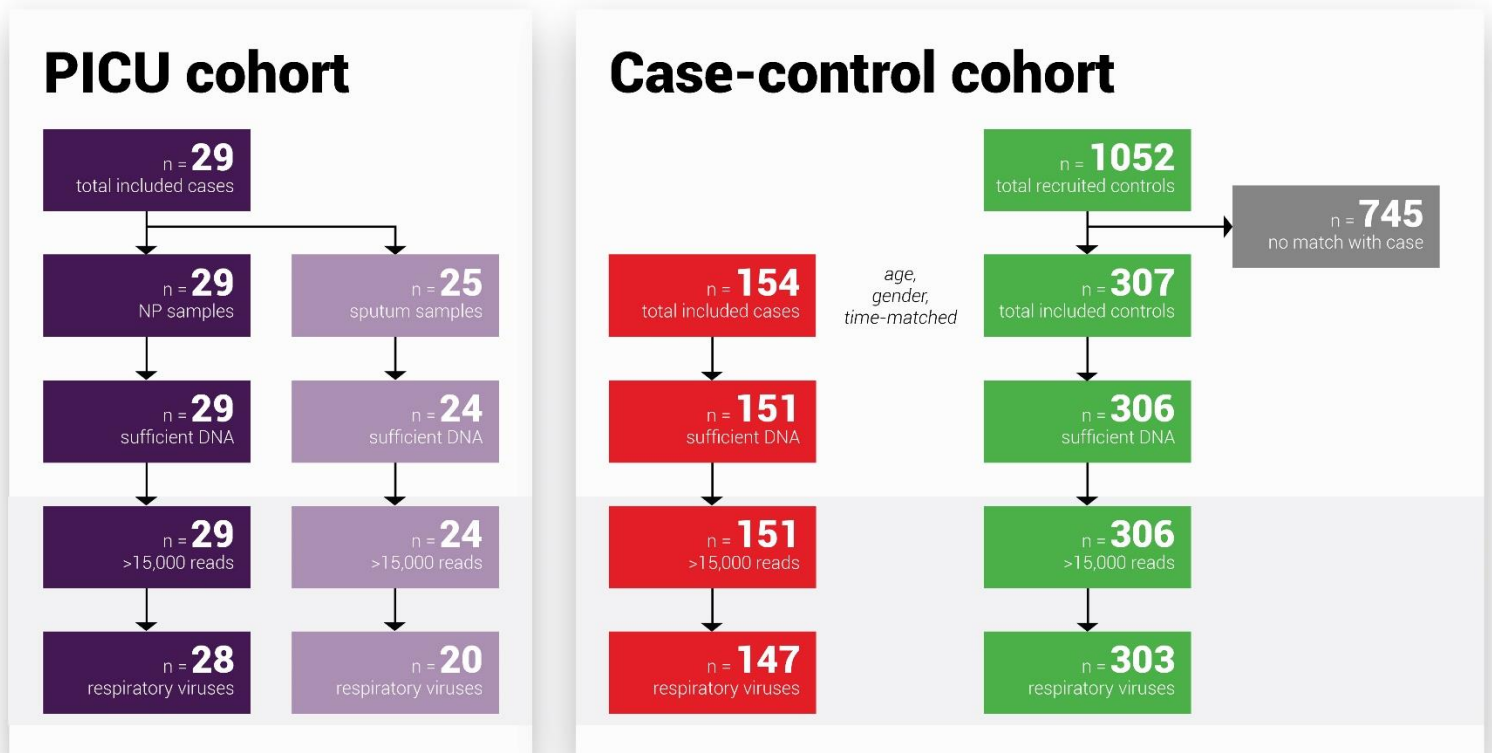

217

218  
219  
220  
221  
222

**Figure S2. Nasopharyngeal and endotracheal samples harbor similar microbiota community compositions.** (A) The Bray Curtis similarities of paired nasopharyngeal and endotracheal samples (Within Cases) was significantly higher than the similarities between cases. Significance symbol: \*\*\* =  $p < 0.001$ . (B) Relative abundances of the 15 most abundant taxa of the nasopharynx and endotracheal aspirate. Taxa are ordered by phylum, i.e. Proteobacteria (green), Firmicutes (orange), Actinobacteria (purple) and Bacteroides (pink).

A

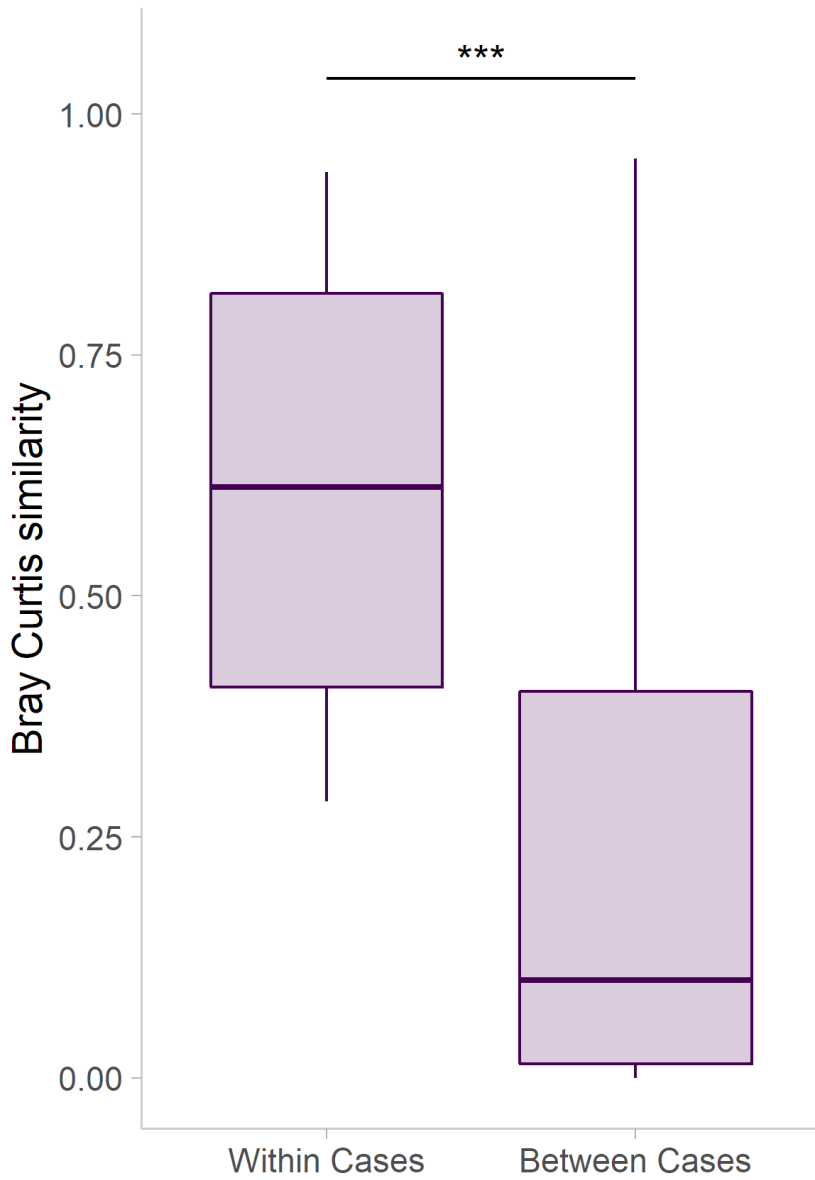

223  
224

225

226

**B**

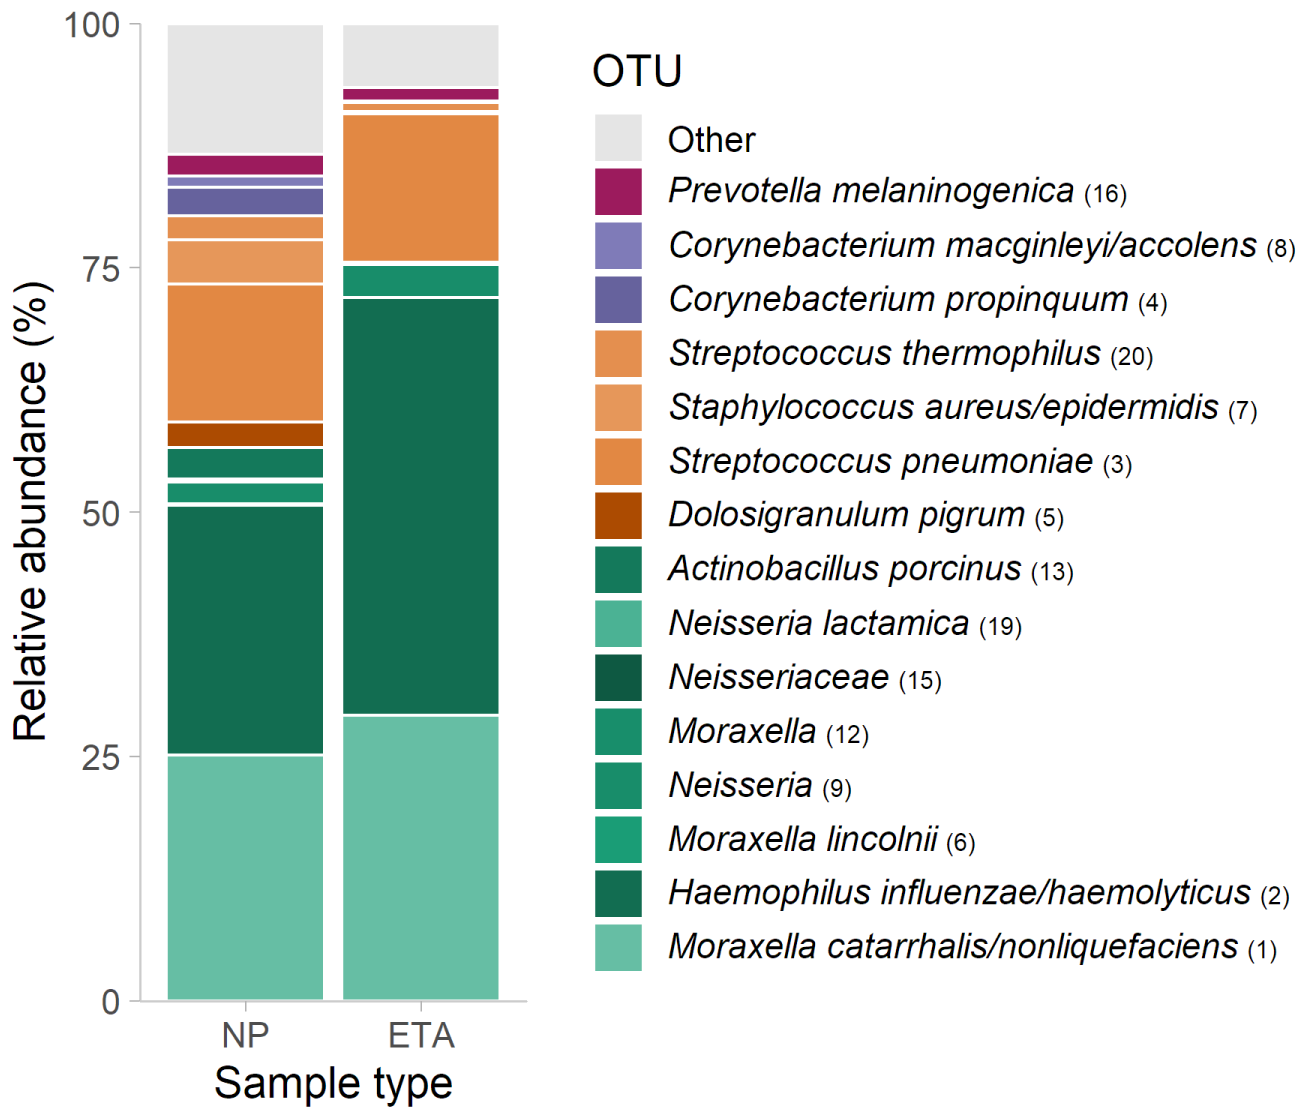

227

228



**Figure S3. Covariate impact on microbial diversity.**

Information of 209 covariates were collected during the study. Data on medication use was acquired by pharmacy printouts, whereas the rest of the data was acquired by parent questionnaires. We depicted all covariates that were significantly univariately associated with the diversity of the nasopharyngeal microbiota (using *adonis*-analysis) based on the healthy control cohort only to avoid confounding effects by disease. The plot shows from left to right for each factor the Spearman correlation coefficients with alpha diversity (Chao1 estimate and Shannon index) and the explained variation in beta diversity (bars representing effect size ( $R^2$ ) and Benjamini-Hochberg adjusted P-values [Q]). Significant positive and negative correlations with richness and diversity are colored red and blue, respectively, while non-significant correlations are greyed out. Only covariates with a P-value <0.05 in *adonis*-analysis are depicted. Because there was substantial multicollinearity between some of the covariates, a multivariable stepwise distance-based redundancy analysis (db-RDA) model was built in addition: covariates that were selected by this model are represented by \*\*\* =  $p < 0.001$ ; \*\* =  $p < 0.01$ ; \* =  $p < 0.05$ ; ns =  $p \geq 0.05$ .

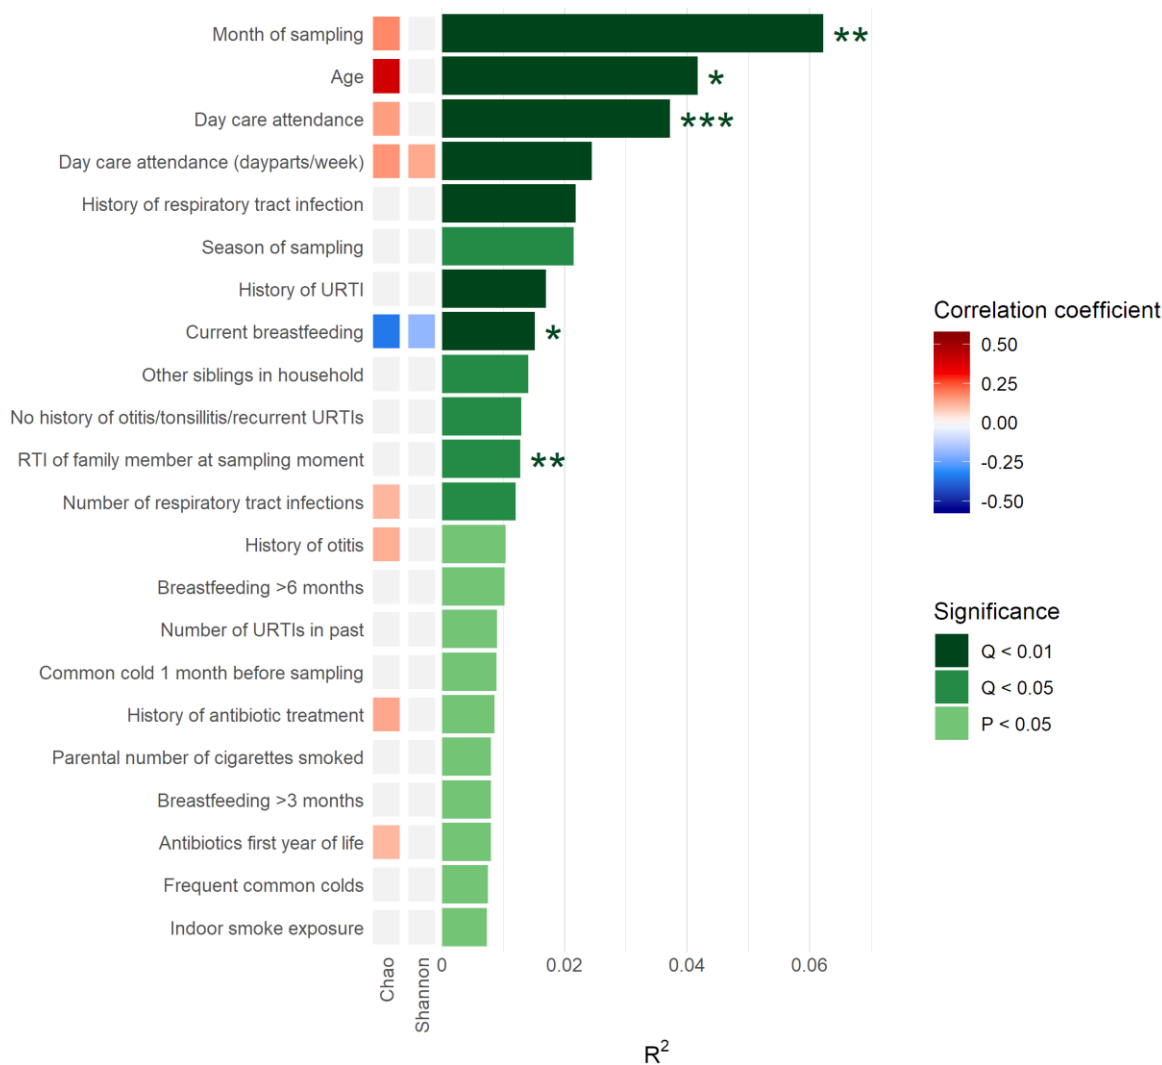

241

242 **Figure S4. Hierarchical clustering of all study samples identified 15 clusters, of which 7 had 5 or more**  
243 **samples.**

244 Classifier taxa for these 7 clusters were: *Staphylococcus aureus/epidermidis*; *Corynebacterium macginleyi/accolens*;  
245 *Haemophilus influenzae/haemolyticus*; *M. catarrhalis/nonliquefaciens*; *Veillonella dispar* & *Actinobacillus*  
246 *porcinus*; *Streptococcus pneumoniae*; *C. propinquum* & *D. pigrum*. Figure A visualizes the clustering dendrogram,  
247 including information on the distribution of the subcohorts and a heatmap of the relative abundance of the 9 classifier  
248 taxa defined by random forest analysis. (B) Mosaic plot showing distribution of case-control cohorts within clusters.  
249 Note that each case was matched to two controls. The *M. catarrhalis/nonliquefaciens* cluster was associated with  
250 health (green: chi-square test,  $p < 0.001$ ), while the *H. influenzae/haemolyticus* and *S. pneumoniae* clusters were  
251 associated with active disease (red: chi-square test,  $p < 0.001$  and  $p = 0.049$  resp.). Additional comparisons of the  
252 remaining clusters against these health and disease associated clusters, demonstrated that the *C. propinquum/D.*  
253 *pigrum* cluster is also related to health (green). (C) Boxplots of the bacterial biomass (determined by 16S qPCR)  
254 across the distinct microbiota profiles from high to low density. Significantly different: solid line =  $p < 0.001$ ; dashed  
255 line =  $p < 0.01$ ; dotted line =  $p < 0.05$ . The health and disease associated clusters are shown in green and red,  
256 respectively.

A

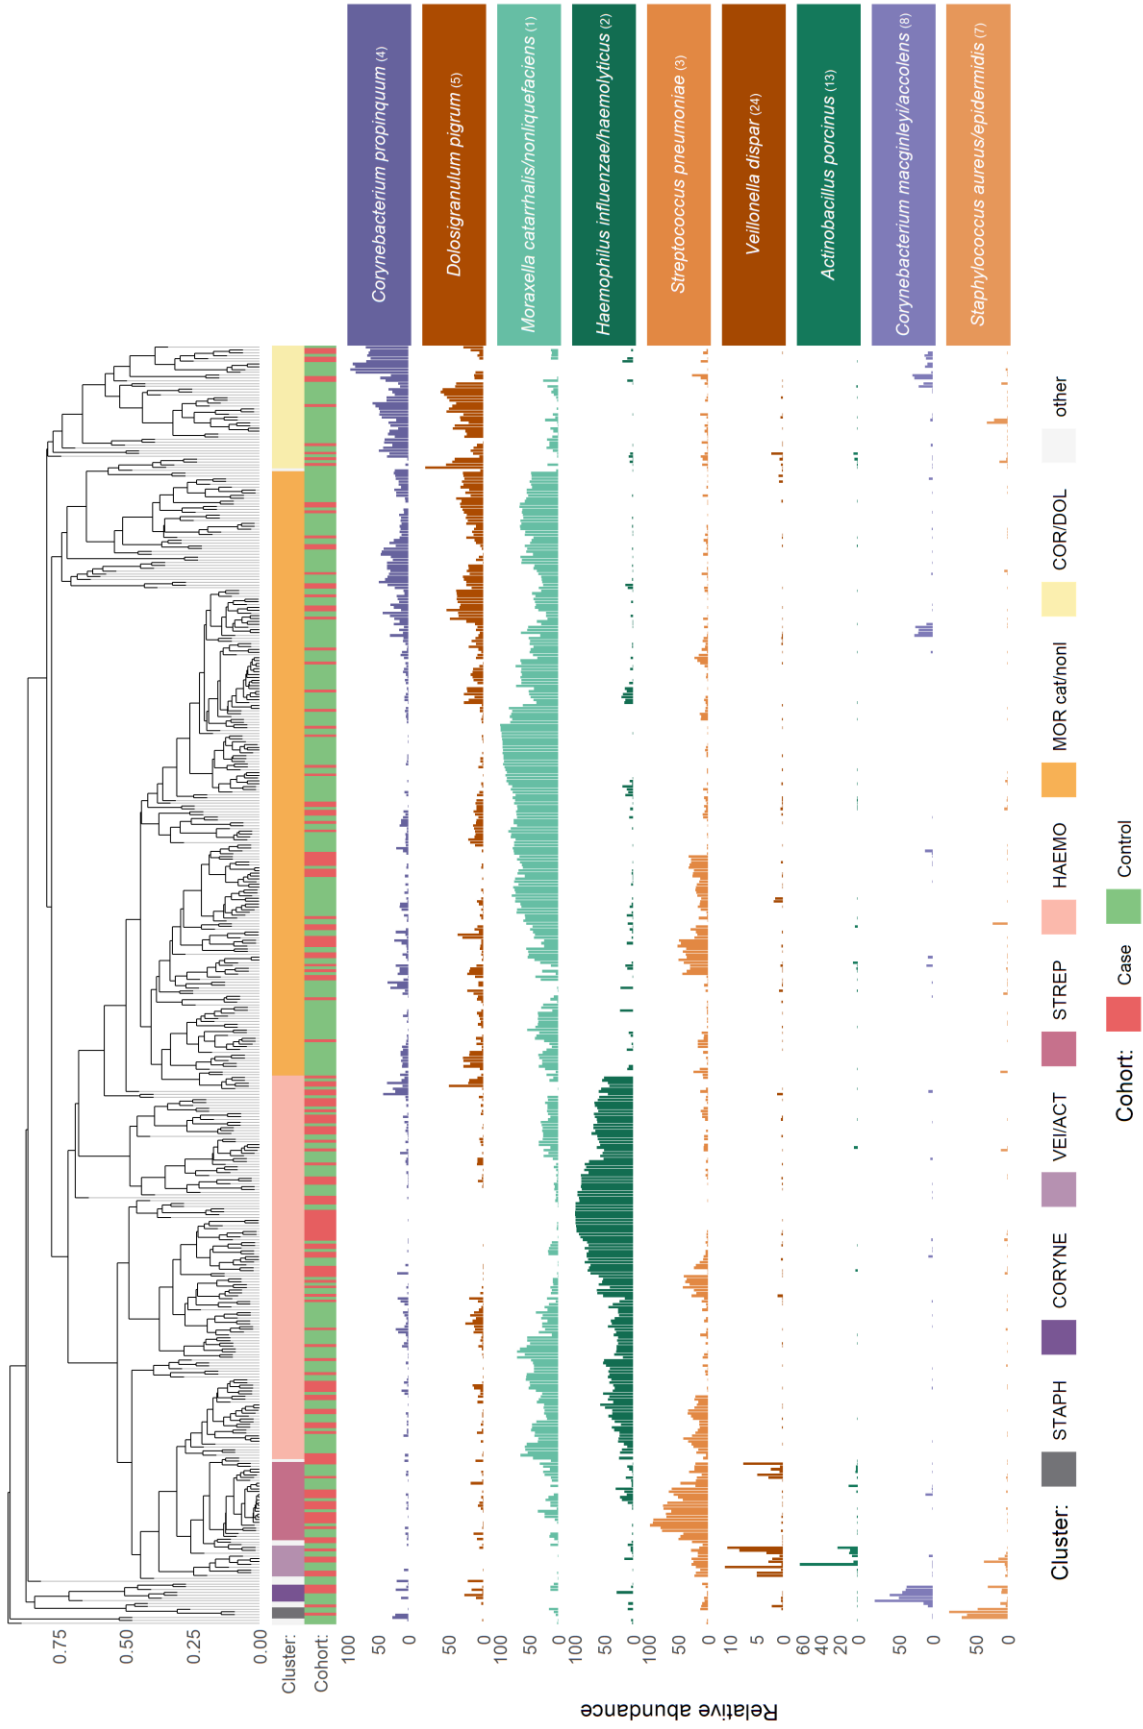

**B**

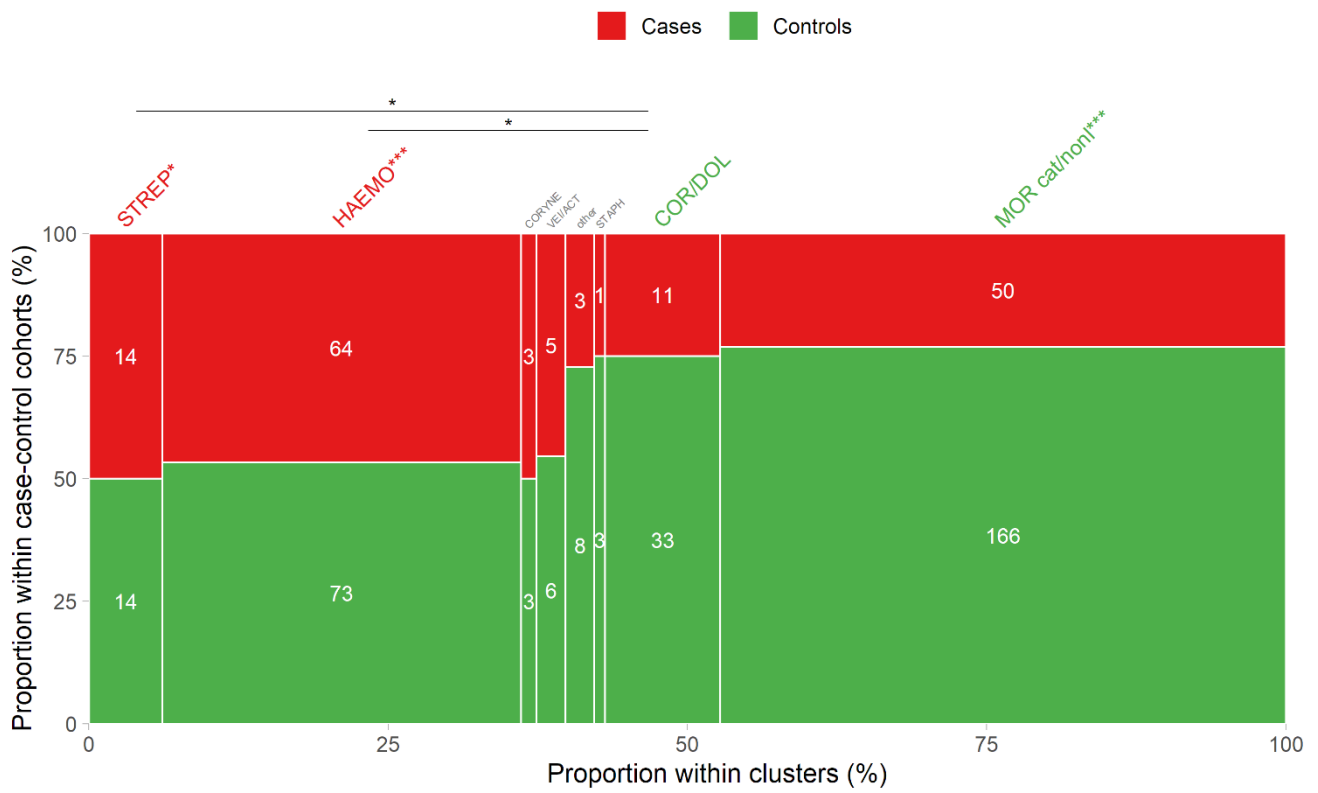

257

**C**

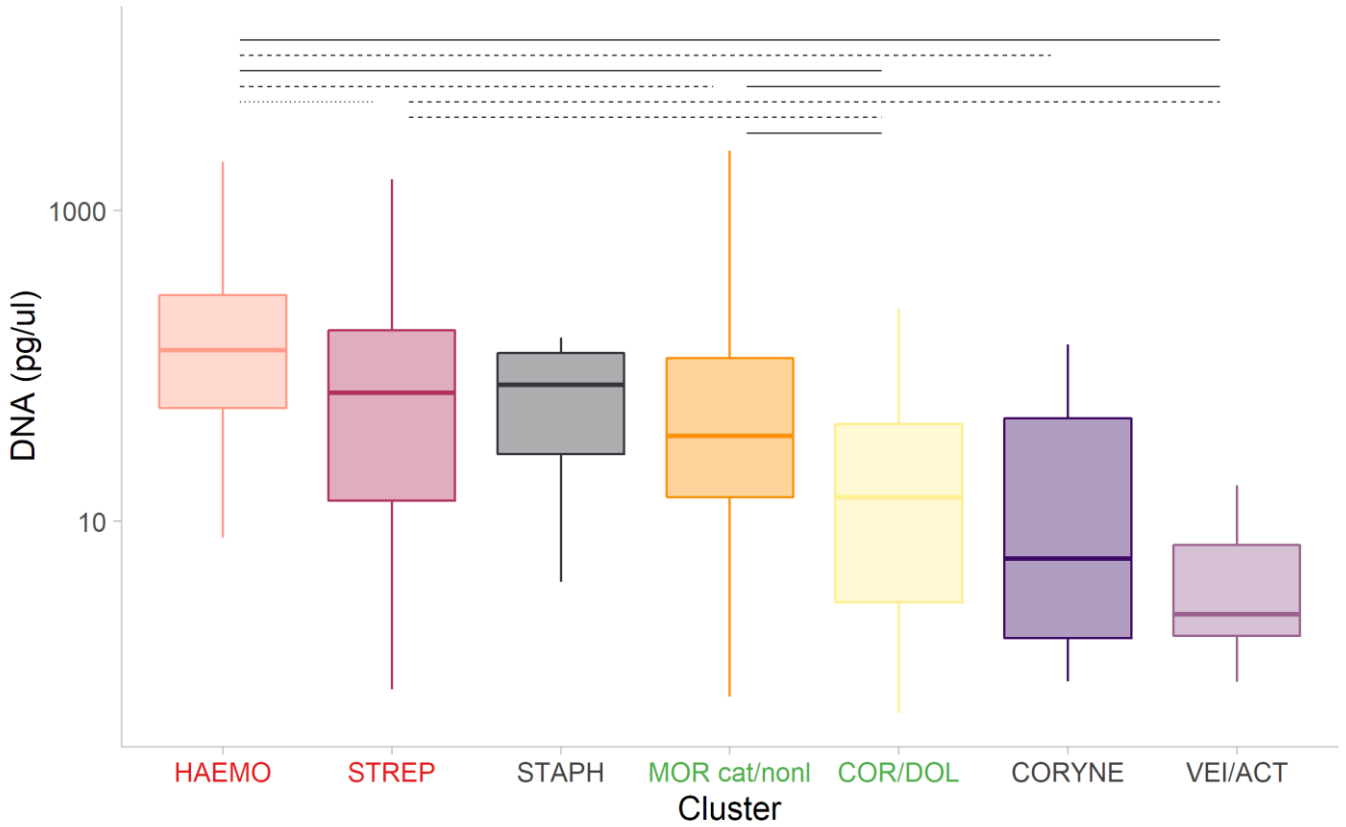

258

259

**Figure S5. Differential abundance of taxa that were significantly associated with health or acute disease.**

Taxa that were significantly increased in cases (right) or in matched controls (left) are depicted in a volcano plot. Log fold changes were obtained by *metagenomeSeq* analysis and corrected for multiple comparisons (Benjamini-Hochberg). The results are depicted from the pairwise comparison of cases and controls of the entire case-control cohort (n=457, **A**), the PICU cohort (n=288, **B**), the subcohorts stratified by phenotype (pneumonia, orange, n=108, **C**; bronchiolitis, purple, n=171, **D**; wheezing illness, green, n=100, **E**; mixed-phenotype, pink, n=78, **F**) and the subcohort stratified for need for antibiotic treatment (to-be-treated, red, n=126 **G**; not-to-be-treated, grey, n=331, **H**).

**A**

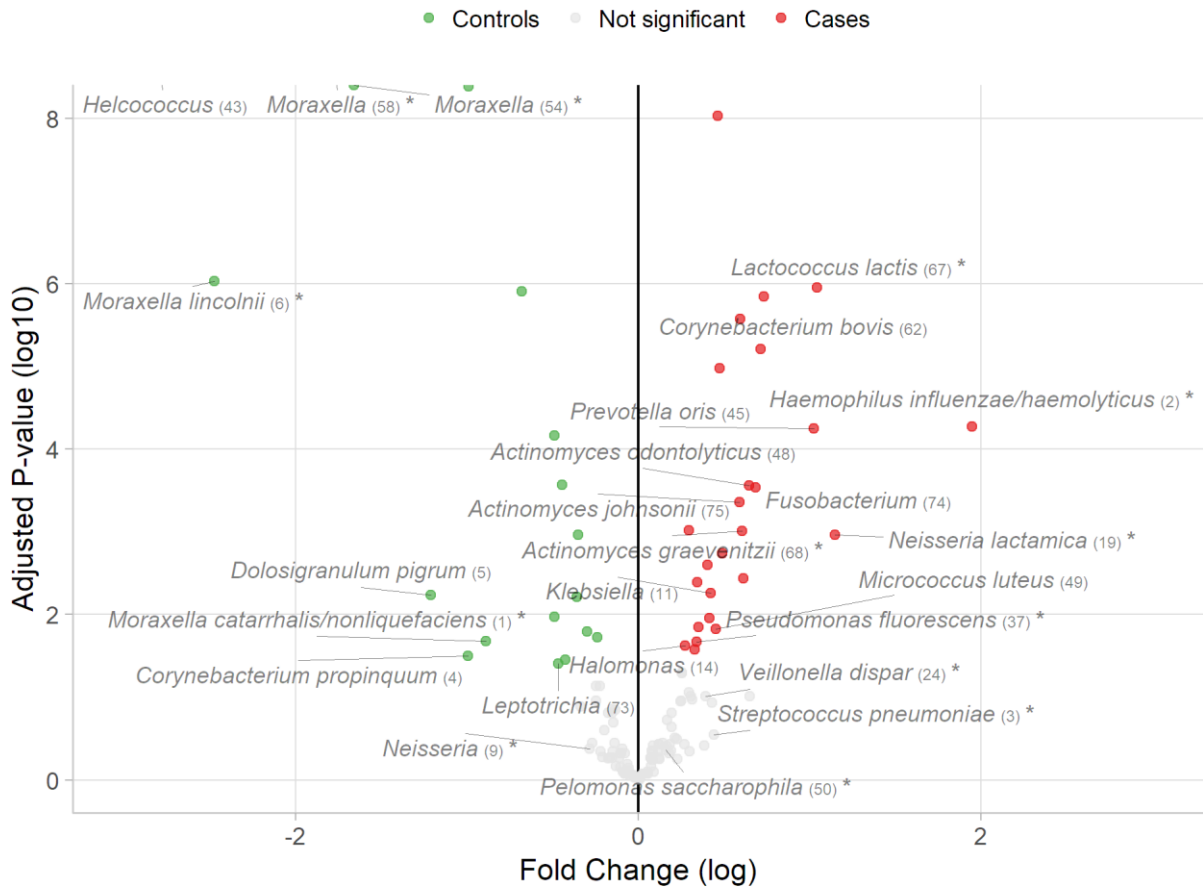

268

**B**

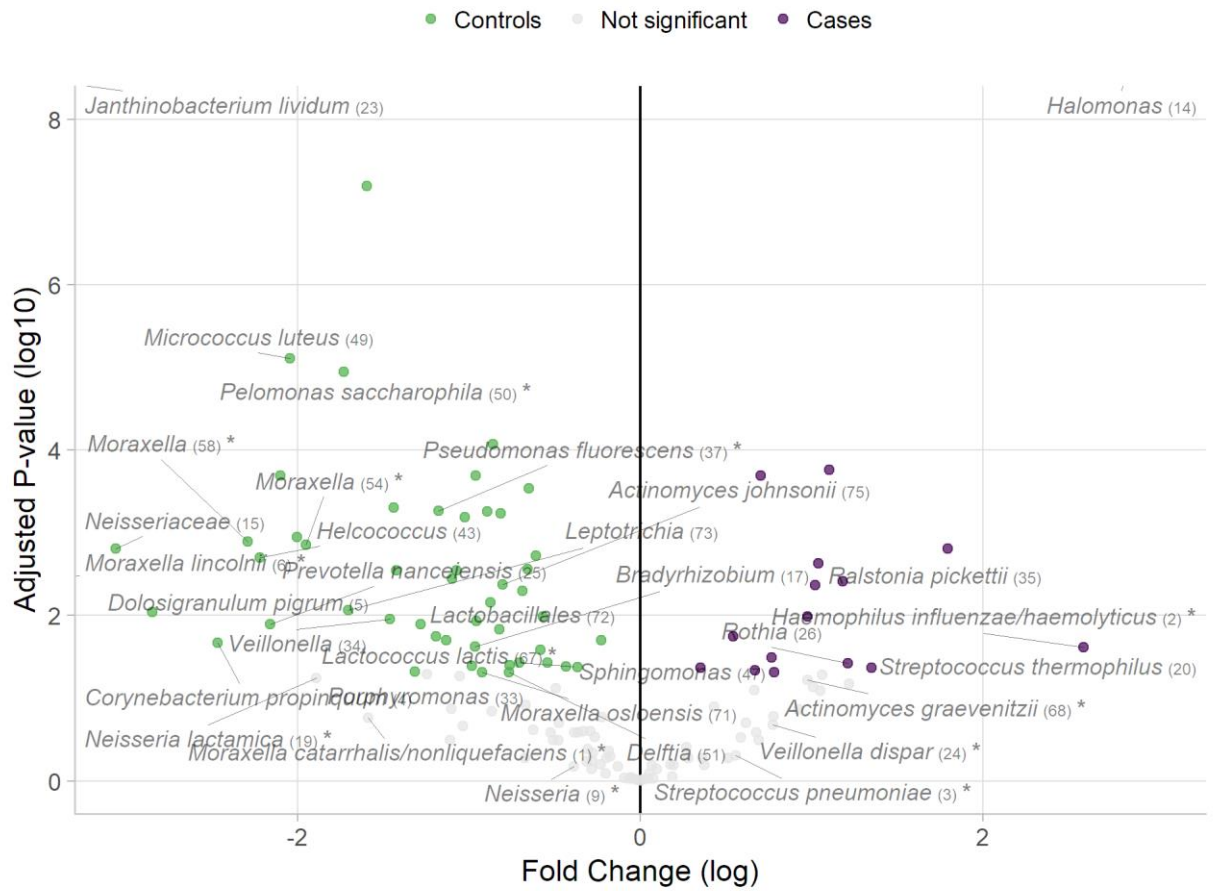

271

C

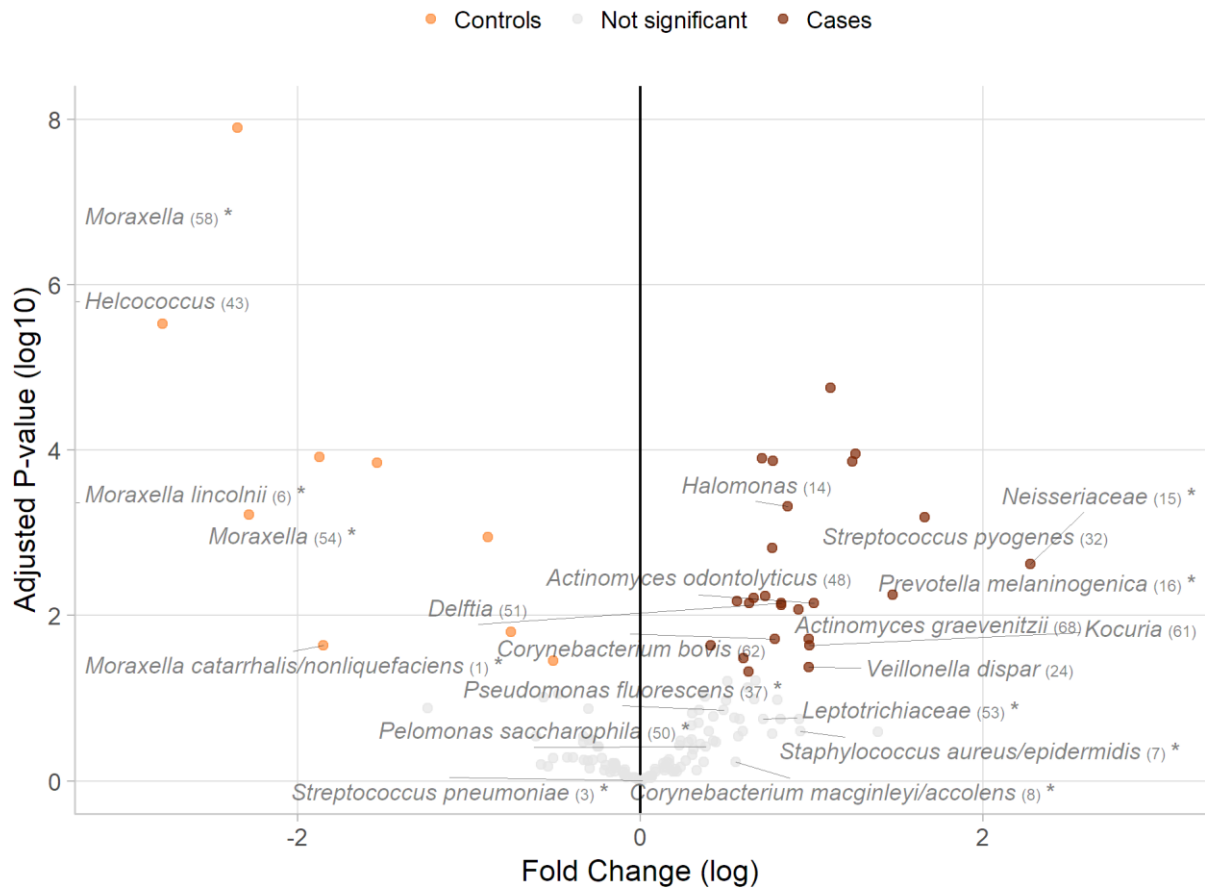

272

D

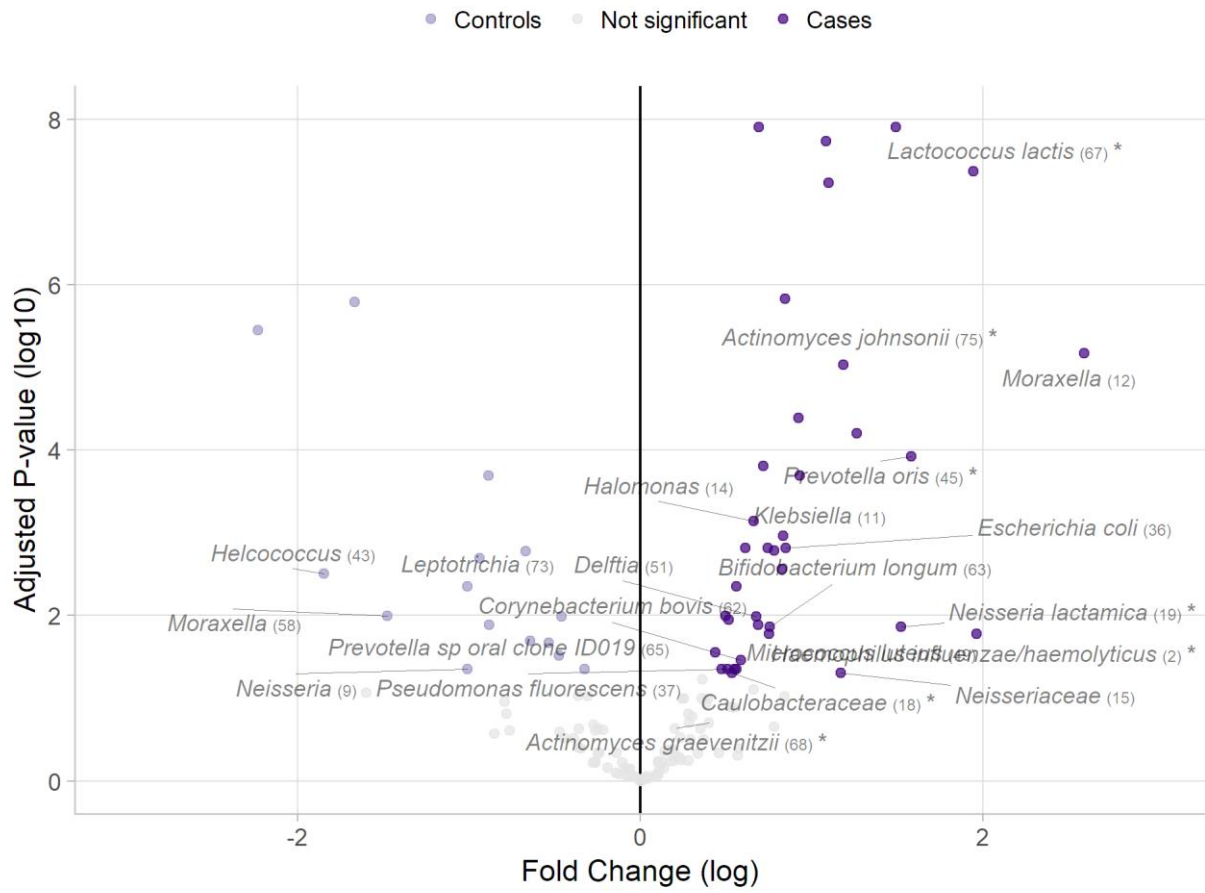



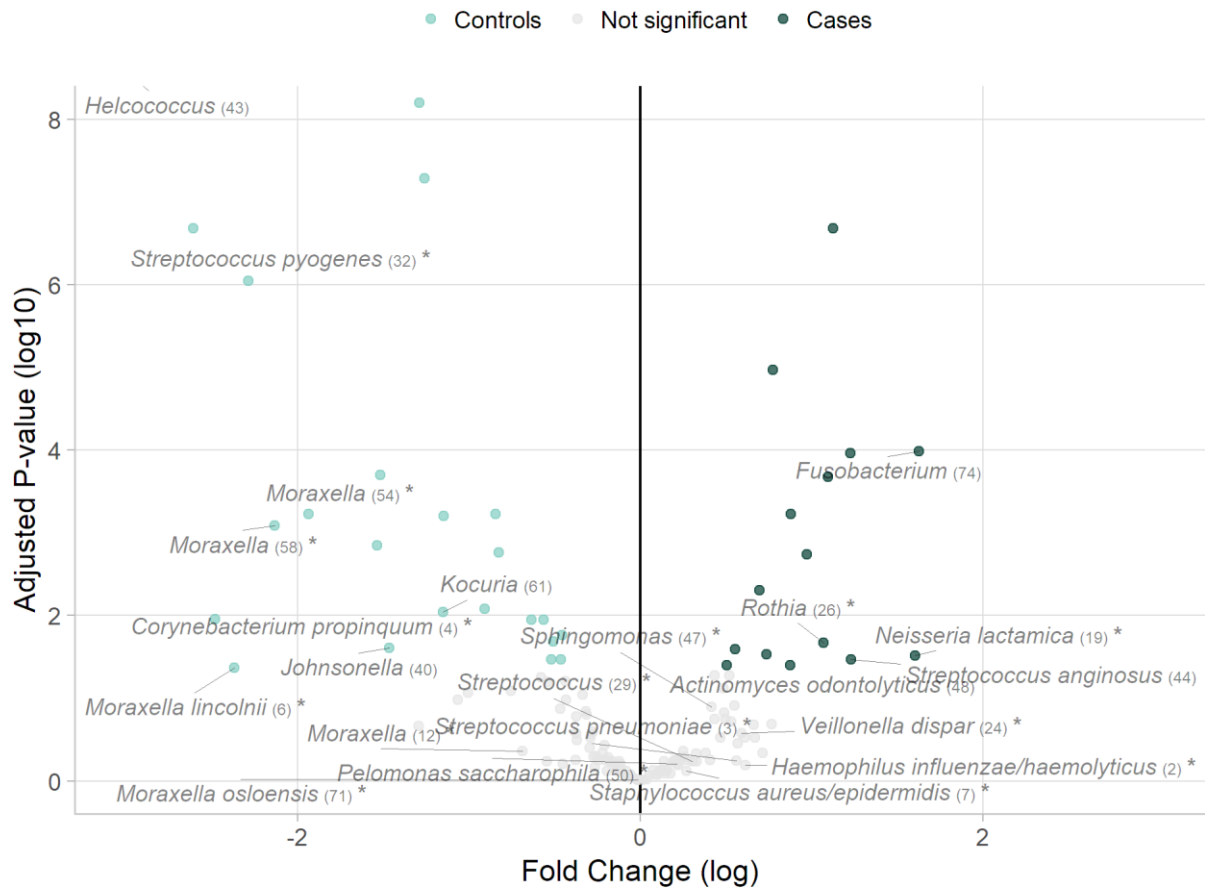

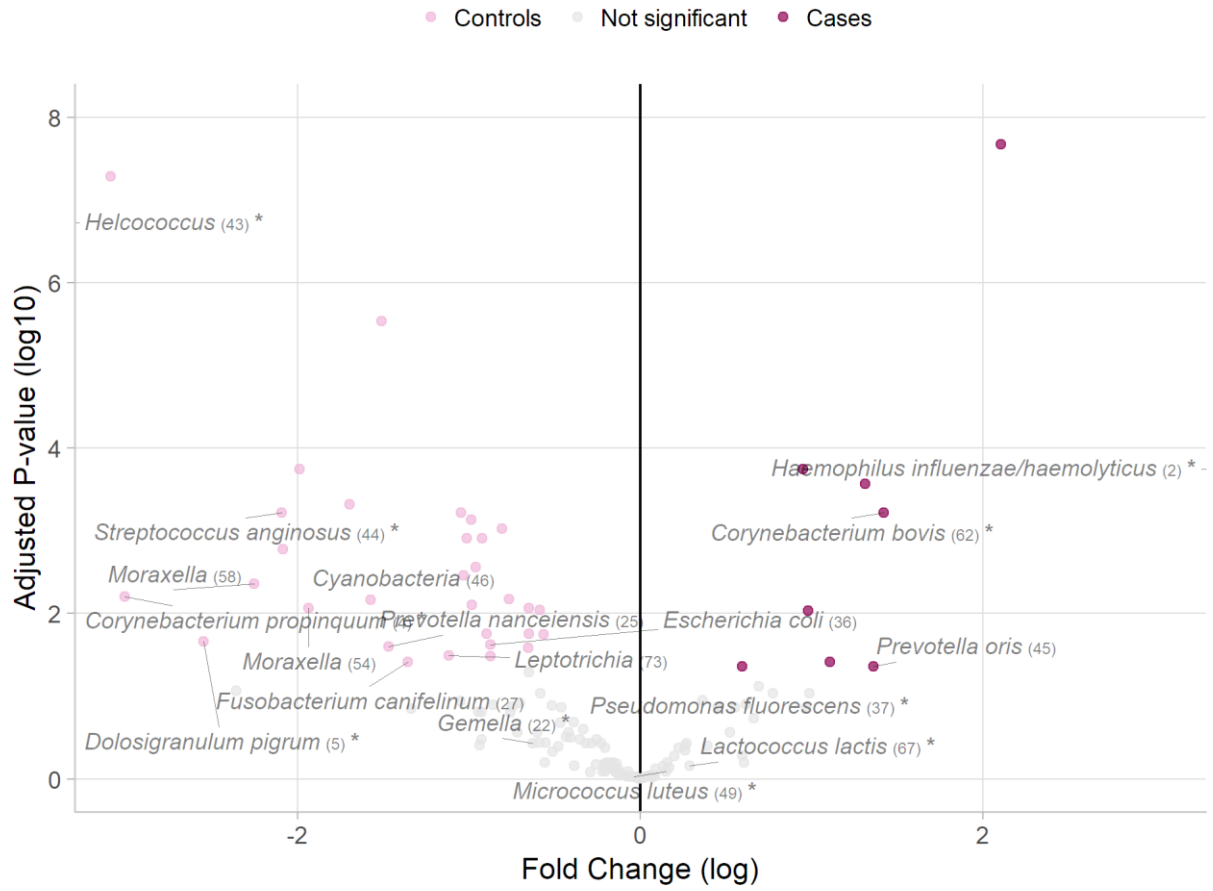

G

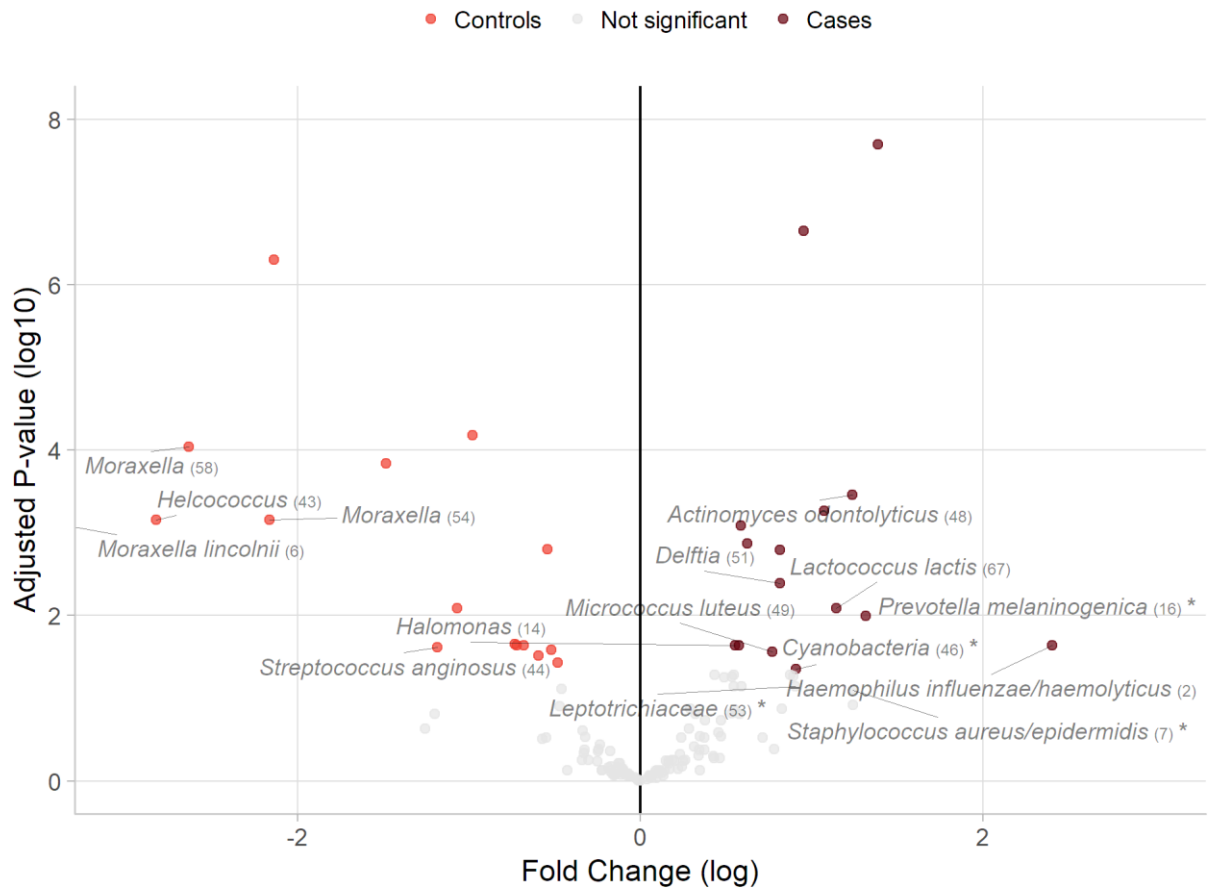

281

**H**

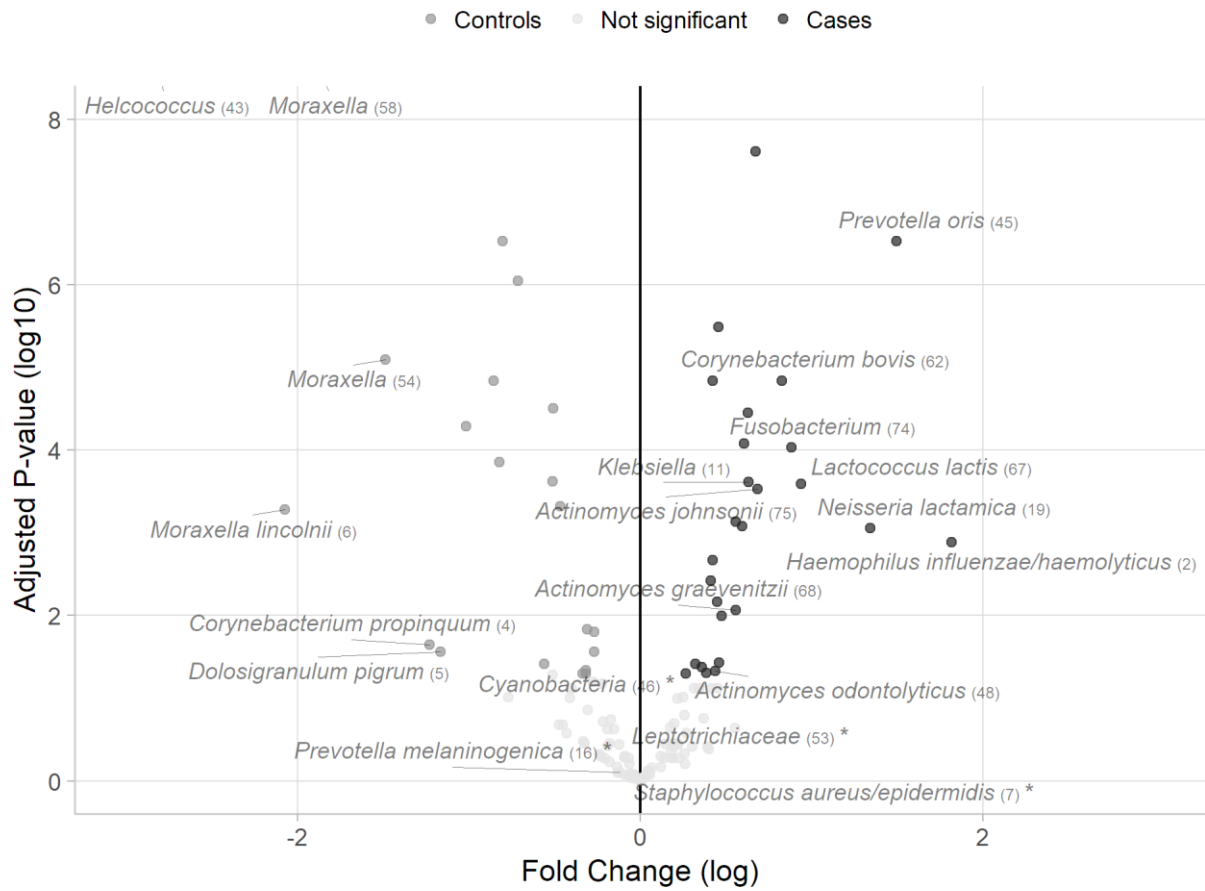

282

283

284

**Figure S6. Results of viral qPCR in cases and controls.**

(A) Two expert pediatricians independently classified all cases of the case-control cohort in three major disease phenotypes, i.e. pneumonia, bronchiolitis, and wheezing illness. Cases with a mixed or unclear phenotype were deemed mixed-phenotype. The figure visualized the proportions of samples positive for any virus, and the specific viruses, stratified for the pneumonia cohort (upper left), bronchiolitis cohort (upper right), wheezing illness cohort (lower left) and mixed-phenotype cohort (lower right). (B) The proportions for the to-be-antibiotic treated cohort (left) and not-to-be treated cohort (right). P values were calculated with conditional logistic regression accounting for the matched nature of the data.

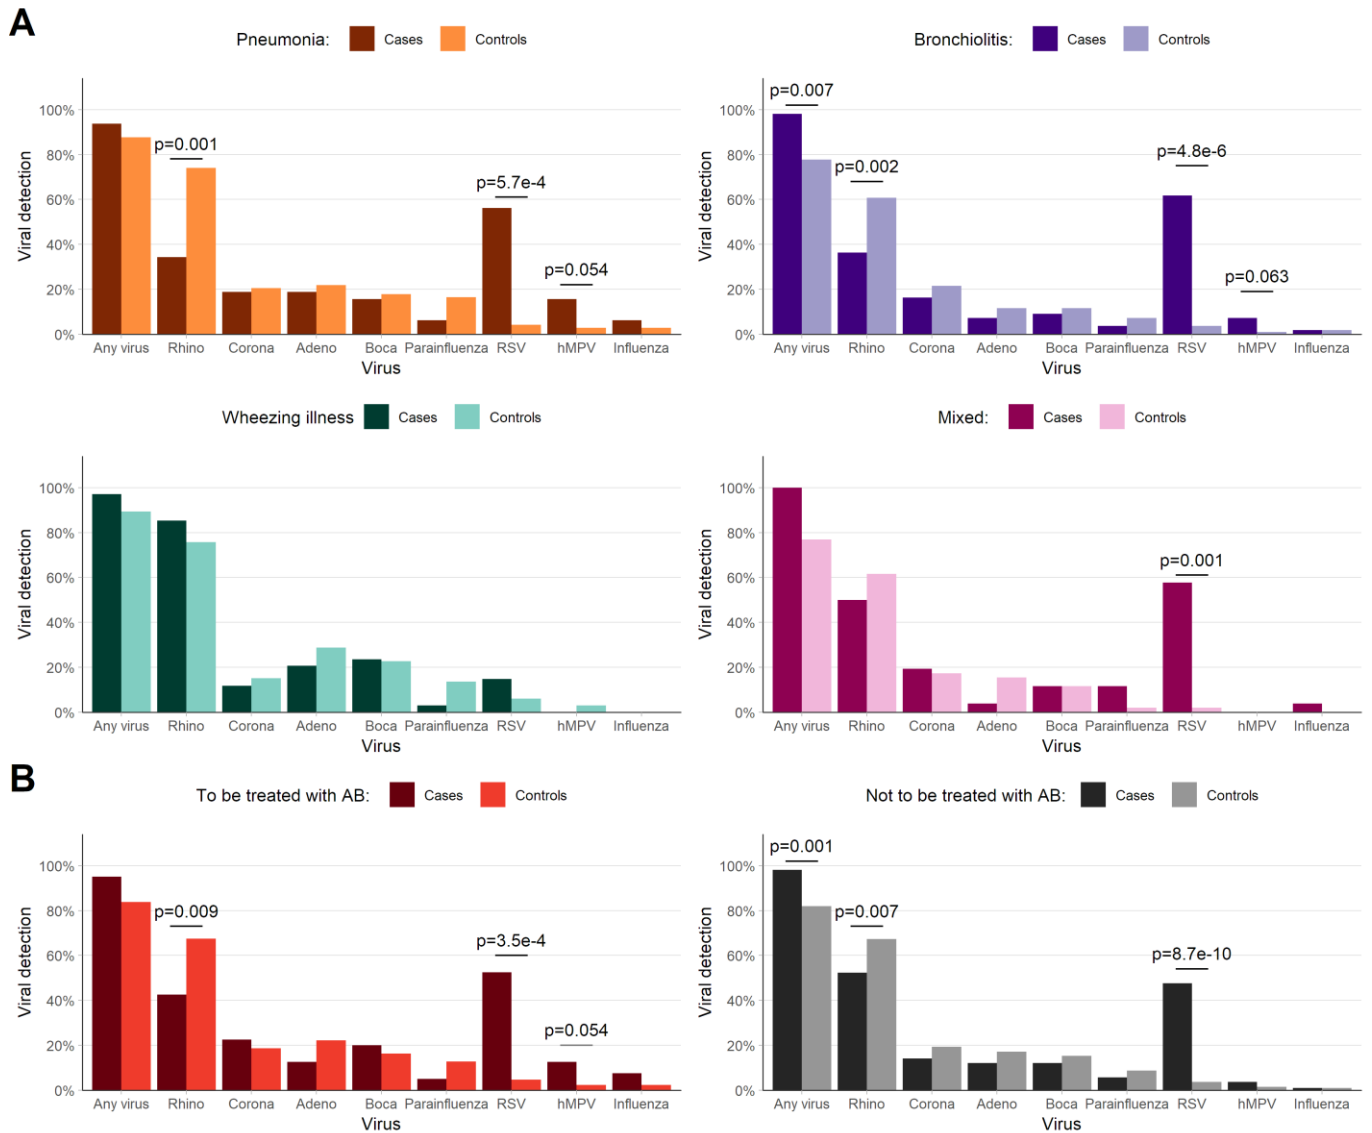

295  
296  
297  
298  
299

**Figure S7. NMDS plots showing cases and controls stratified for the different phenotypes.**

NMDS plots stratified by disease phenotypes visualizing the differences in composition of the LRTI-cases at admission compared to their matched controls (pneumonia [upper left, n=108], bronchiolitis [upper right, n=171], wheezing illness [lower left, n=100], mixed-phenotype [lower right, n=78]). Ellipses represent the standard deviation of all points within a cohort. Stress: 0.269.

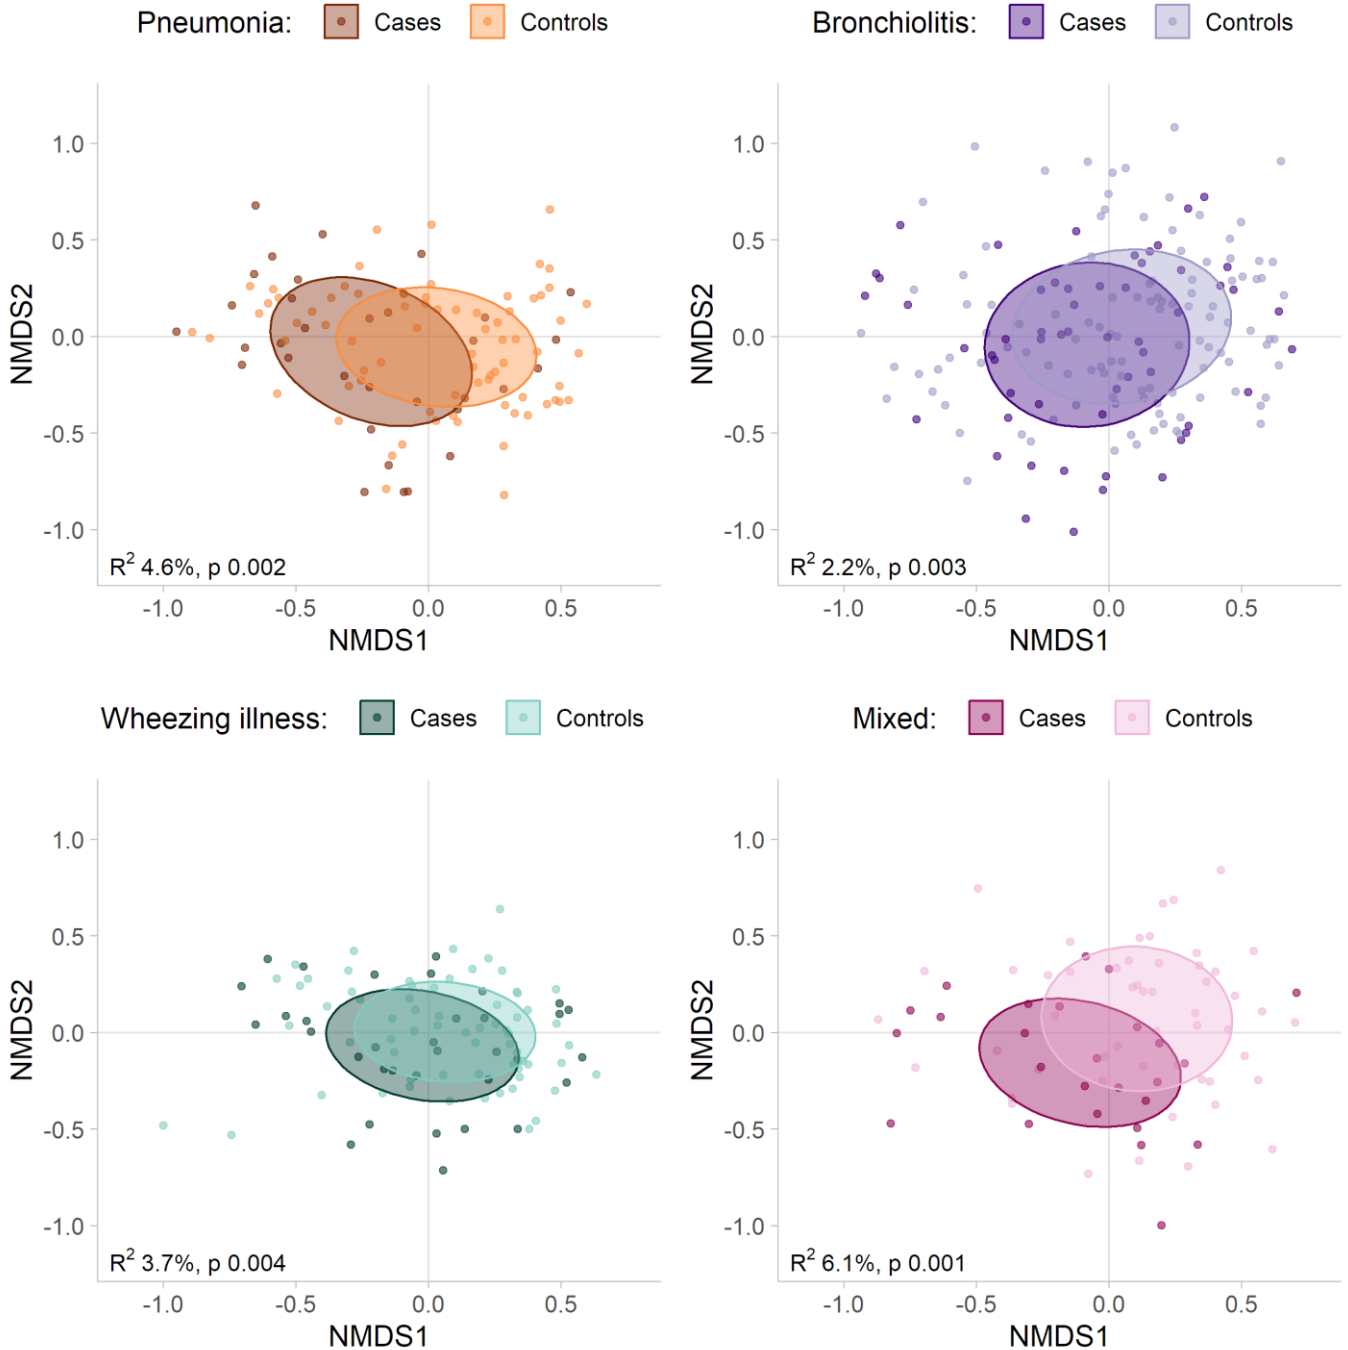

300

**Figure S8. Random forest models classifying disease and health based on (clustered) genus level bacterial microbiota data, viral presence and patient characteristics combined.**

Nineteen variables in total were discriminating cases from controls in the unstratified cohort (n=457; **B**) leading to a sparse classification model with an AUC of 0.92 (**A**). Variables are ranked in descending order based on their importance to the accuracy of the model. Variable importance was estimated by calculating the mean decrease in Gini after randomly permuting the values of each given variable (mean  $\pm$  standard deviation, 100 replicates). The direction of the associations was estimated *post-hoc* using point biserial correlations (green = associated with health; red = associated with disease). The disease-discriminatory variables for the pneumonia cases (brown, n=108; **C**), bronchiolitis cases (purple, n=171; **D**), wheezing illness cases (dark green, n=100; **E**), and mixed-phenotype cases (pink, n=78; **F**) versus their matched controls are depicted in figures **C-F** (light colored bars are positively associated with health). The ROC curves for distinguishing disease from health of these stratified sparse random forest classifying models are depicted in **A**.

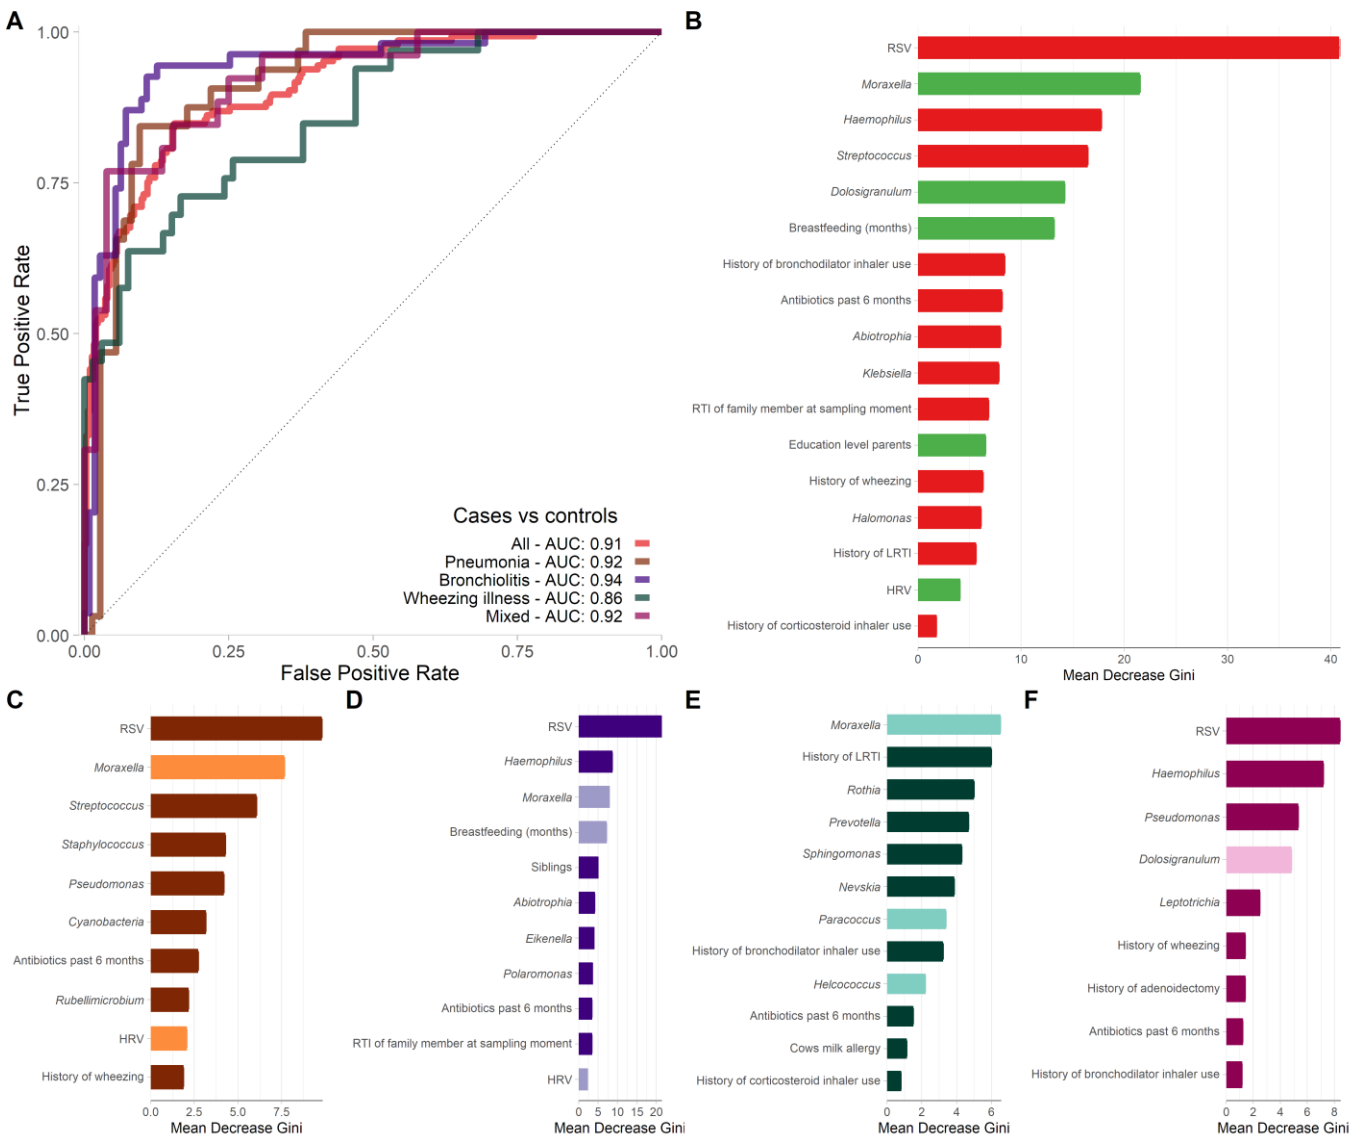

313

314  
315  
316  
317  
318

**Figure S9. NMDS plots showing cases and controls stratified by future antibiotic treatment.**

NMDS plots of total microbiota composition in samples stratified by LRTI-cases who were to-be-treated with antibiotics during admission (left, n=126) and those who were not-to-be-treated with antibiotics (right, n=331) compared to their respective matched controls (lighter tint). Ellipses represent the standard deviation of all points within a subcohort. Stress: 0.269.

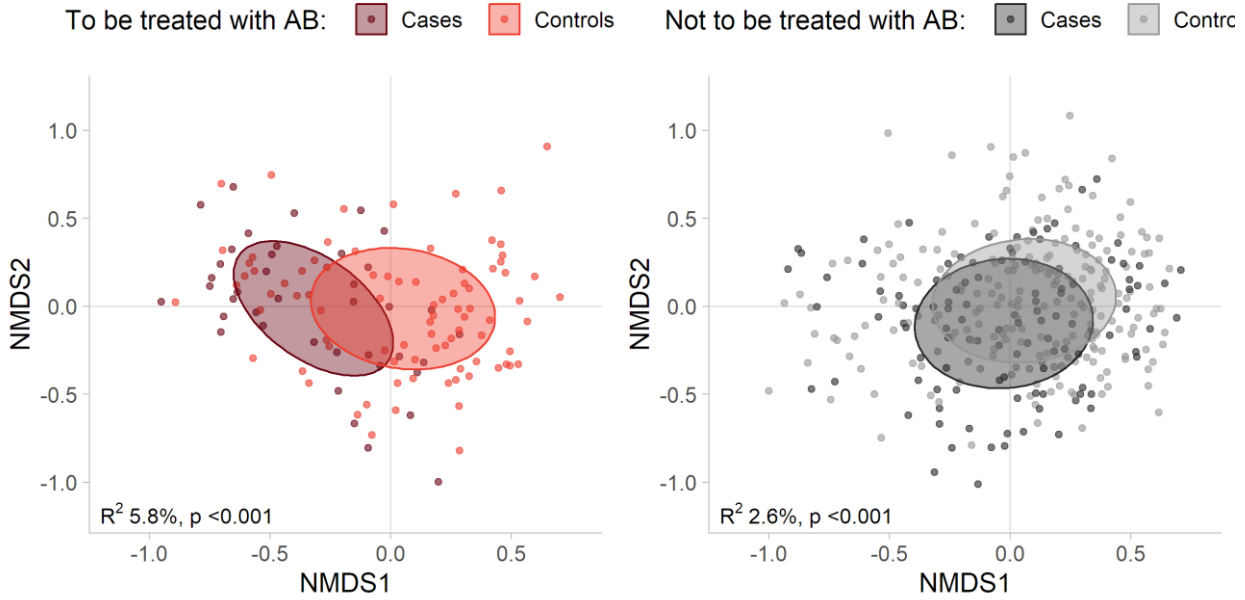

319  
320



**Figure S10. Sparse random forest prediction model of the hospitalization duration.**

(A) Thirteen duration-predictive variables were selected by a cross-validated stepwise ascending variable introduction strategy (VSURF) on the random forest regression model of the full dataset combining viral presence and bacterial abundance data as well as patient characteristics. The individual association of these duration-predictive variables with hospitalization duration is depicted as a heatmap of their mean values against short (1-3 days), medium (4-5 days) and long (>5 days) hospitalization, except for disease phenotype as this is a categorical variable. Colours correspond with row wise normalized values (i.e. white indicates the overall minimum value of that variable, purple indicates the overall maximum value). Next to the heatmap, the importance of the duration-predictive variables to the accuracy of the sparse model are depicted as bars (increase in node purity, mean  $\pm$  standard deviation of 100 random replicates). (B) The sparse model comprising these 14 variables predicted duration of hospitalization with a Pearson's  $r$  of 0.50. (C) Remarkably, the model was only accurate for patients not-to-be-treated with antibiotics (green,  $n=111$ ) but not for the to-be-treated cohort (red,  $n=40$ ,  $p=0.033$  comparing the coefficients of the linear models) underlining that antibiotic treatment is interfering with the natural process of recovery.

**A**

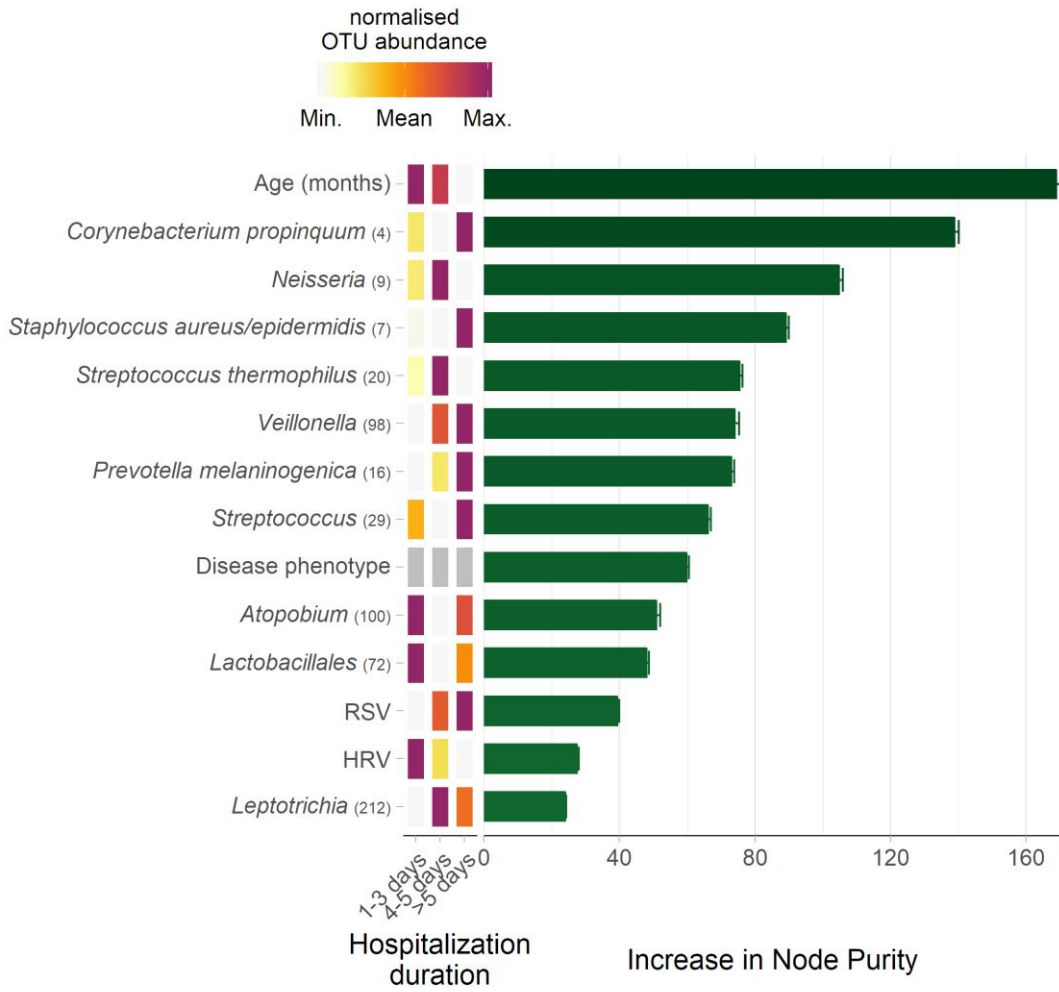

**B**

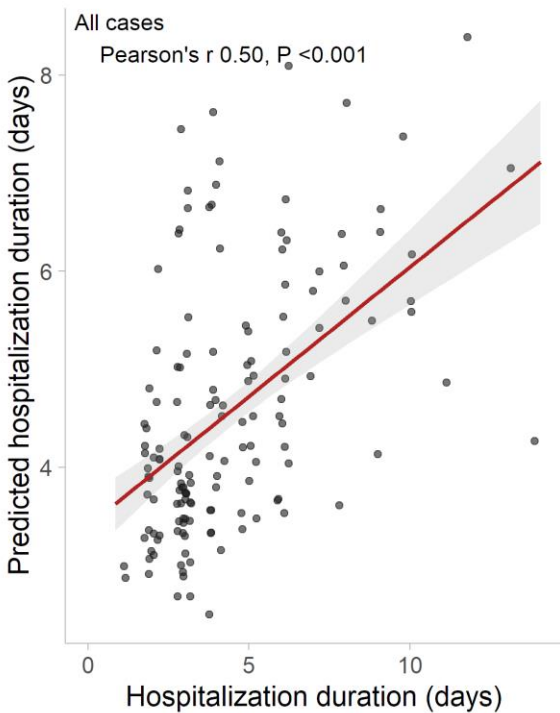

**C**

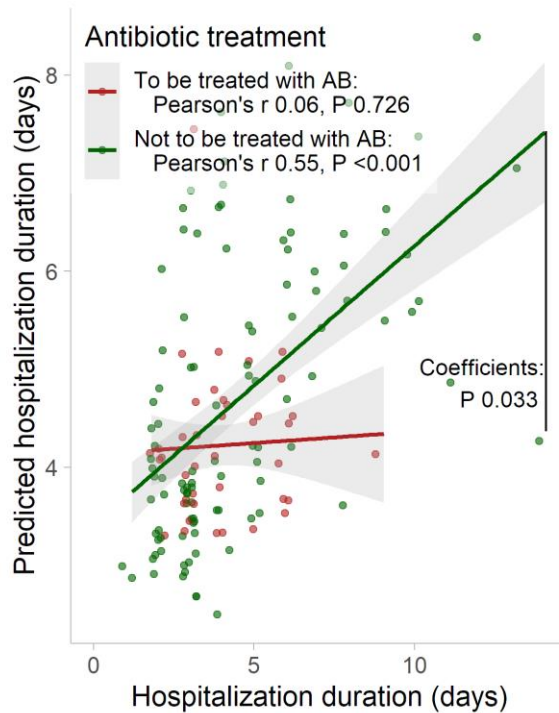

**Figure S11. Associations between microbiota composition and disease severity and recovery using the PICU cohort.**

(A) NMDS biplot depicting the individual microbiota composition colored by subcohort: PICU-cohort cases at admission (purple), case-control cohort cases at admission (red) and controls (green). Ellipses represent the standard deviation of all points within a subcohort. Total microbiota composition of PICU-cases is more deviated from that of healthy controls than cases admitted in a general pediatric ward and (B) shifts towards a composition with a higher abundance of *H. influenzae/haemolyticus* and *S. pneumoniae*, and a lower abundance of *Moraxella*, *Dolosigranulum*, and *Corynebacterium* spp. Both NMDS biplots also depict the 9 biomarkers determined in Supplementary Figure 4.

A

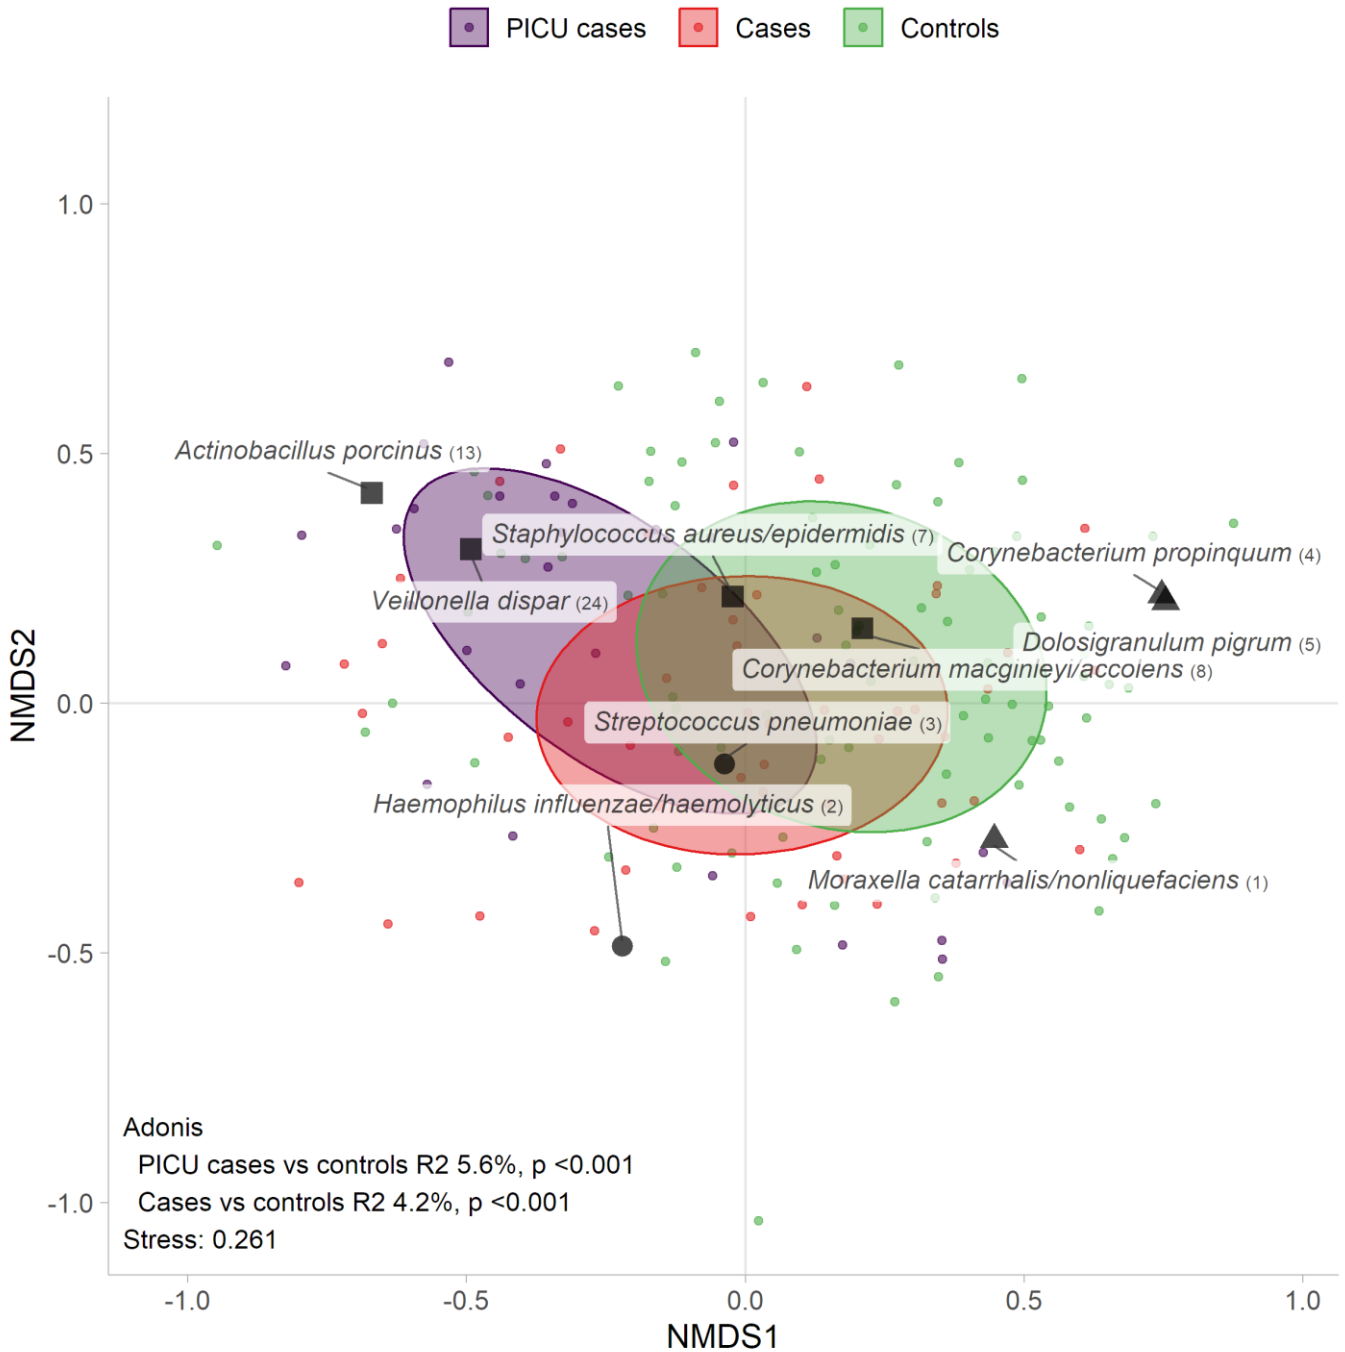

345

346

**B**

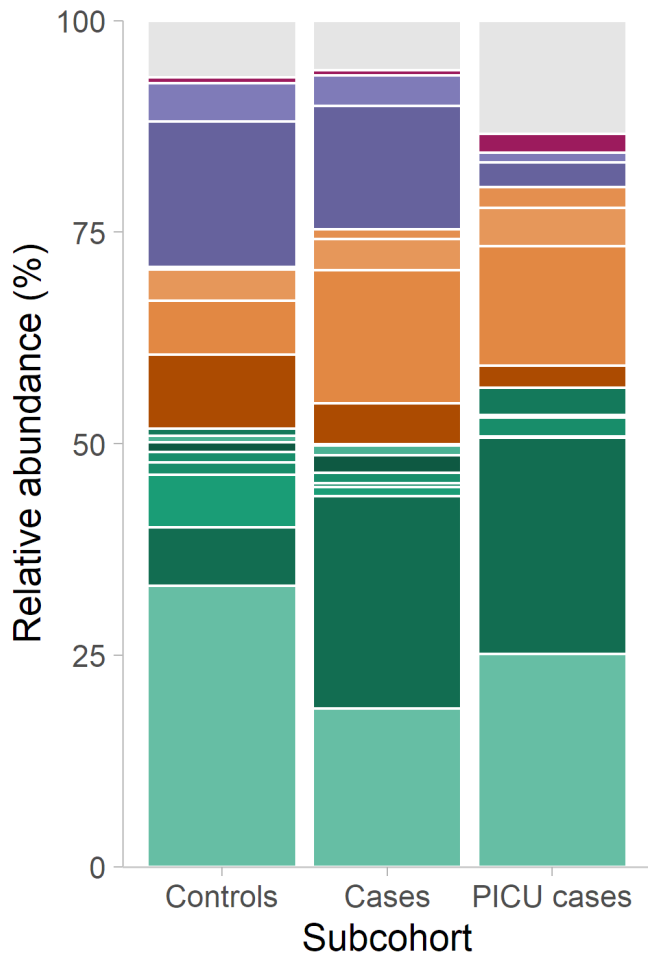

347

348

349  
350  
351

**Figure S12. Rarefaction curves for all study samples on raw count data approached plateau.**  
Results of rarefaction analyses are depicted for the PICU cohort (top) and case-control cohort samples (bottom), separated for sampling cohort.

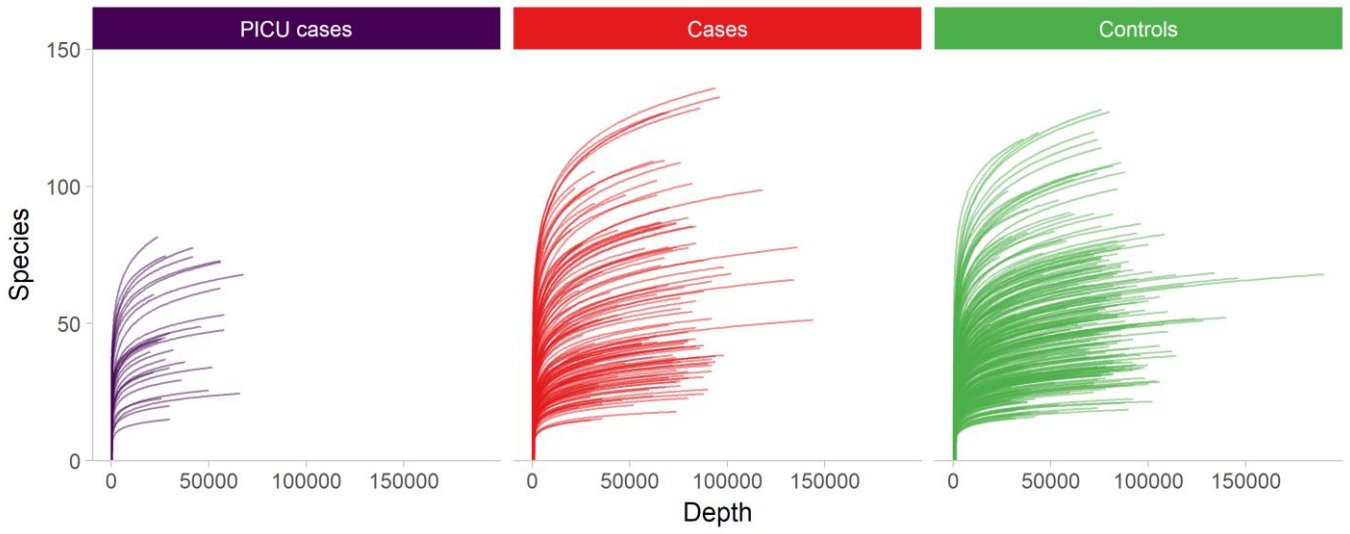

352

353 **Figure S13. Samples are distinct from blanks.**

354 Both the DNA load and the number of reads in the DNA isolation blanks and PCR blanks (red) were at least an order  
 355 of magnitude lower compared to the samples (black; **A** & **B**). Boxplots of samples are divided by cohort and sample  
 356 type. (**C**) visualizes the hierarchical clustering dendrogram, which clearly separates the blanks (red) from the samples  
 357 (grey). ETA = endotracheal aspirate, NP = nasopharynx.

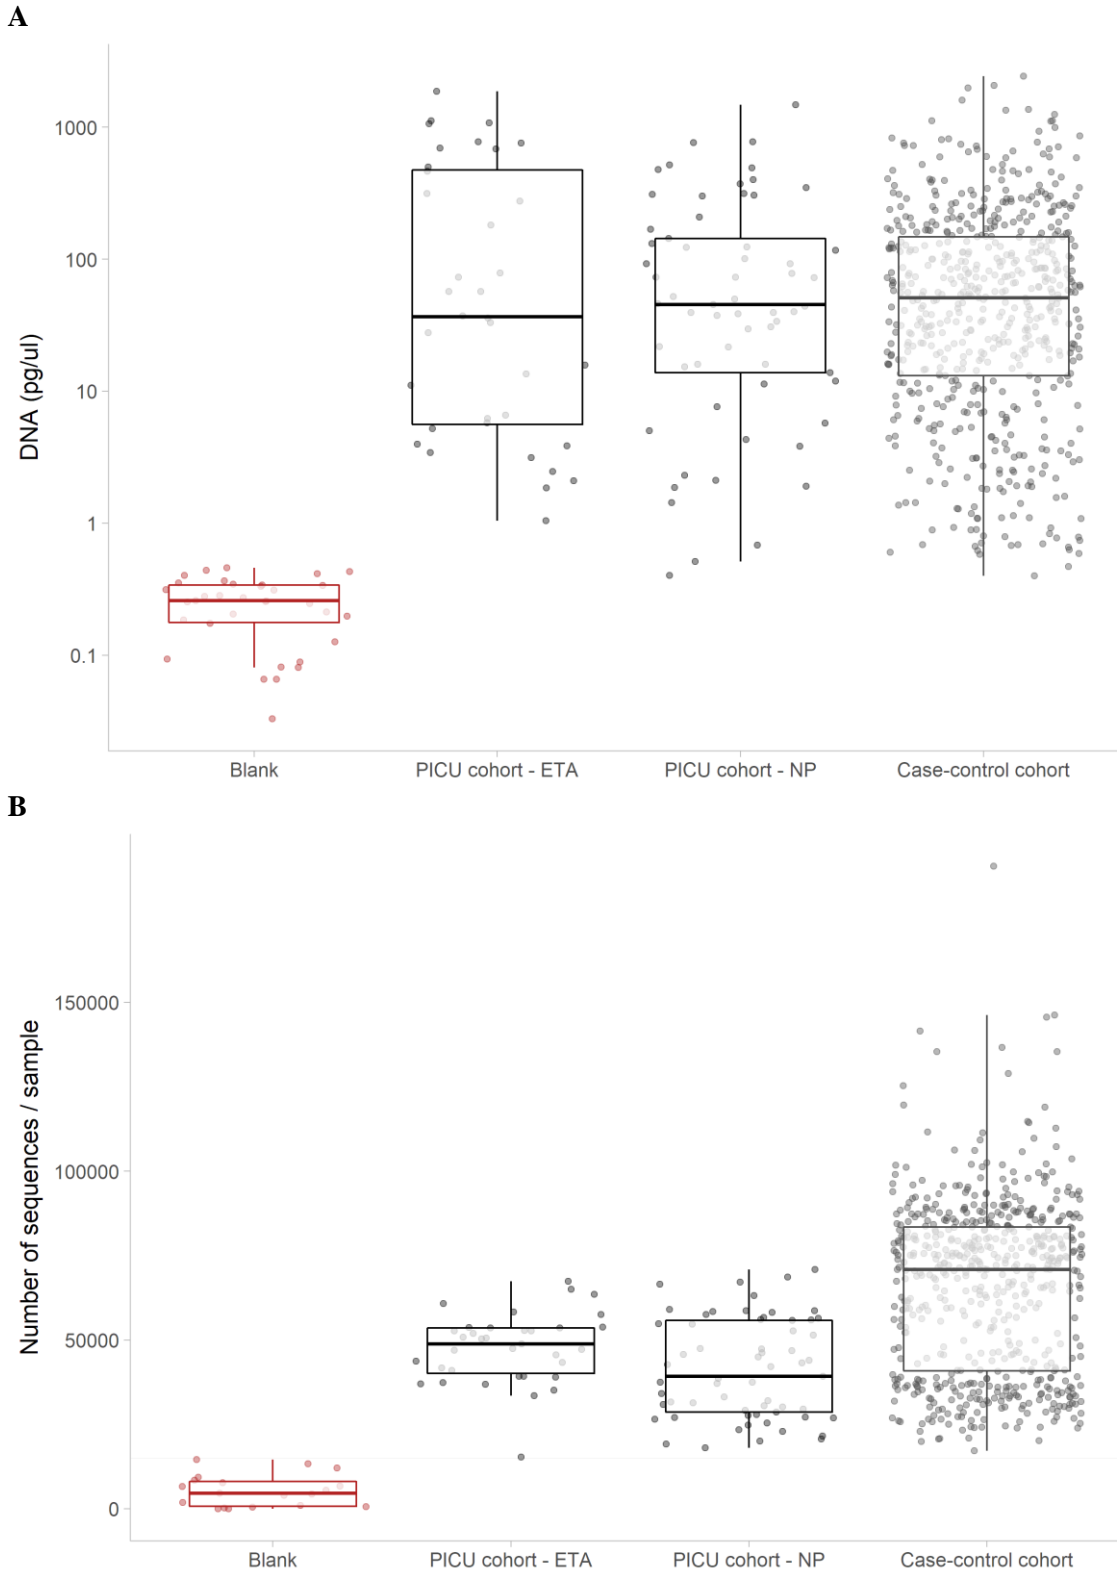

C

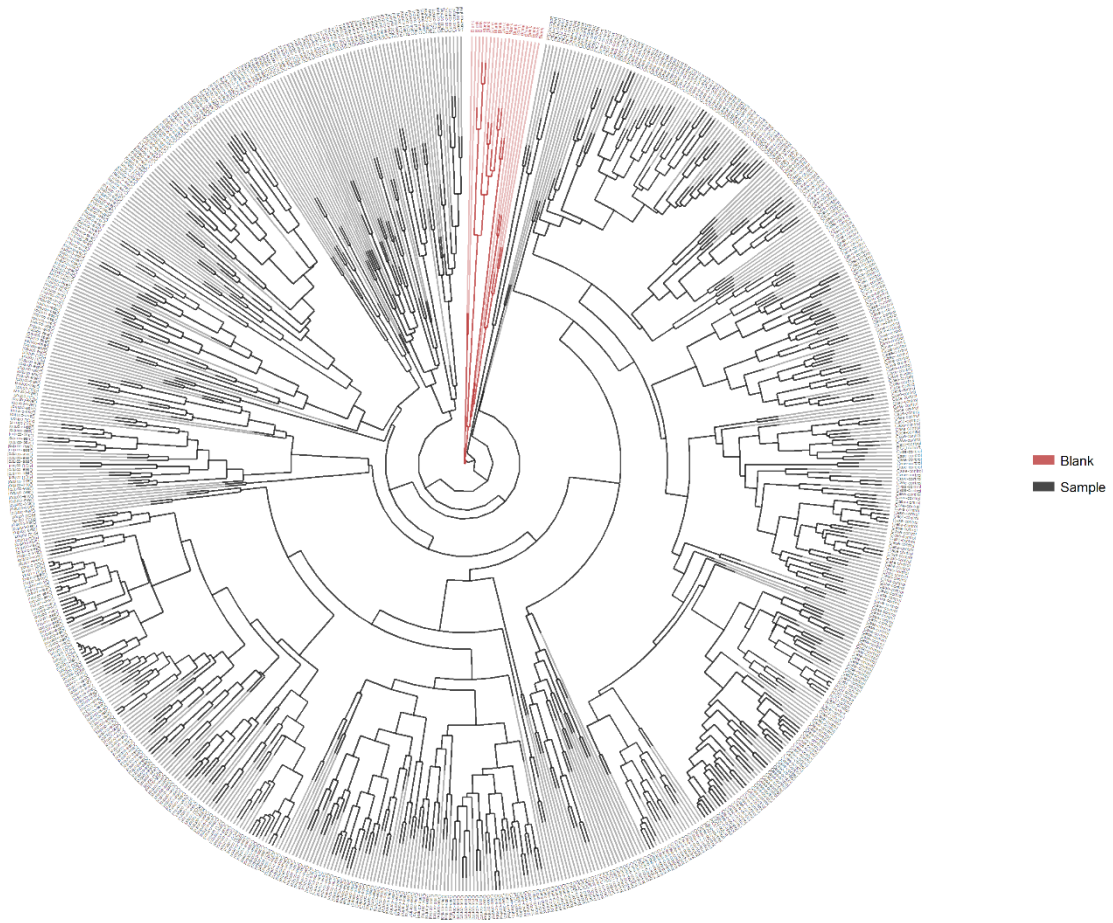

358

359

360 **Figure S14. Twenty-one OTUs were identified as contaminants.**

361 The frequency of each OTU is depicted as a function of the bacterial biomass. The dashed black line shows the  
362 model of a noncontaminant sequence feature for which frequency is expected to be independent of the input DNA  
363 concentration. The red line shows the model of a contaminant sequence feature, for which frequency is expected to  
364 be inversely proportional to input DNA concentration, as contaminating DNA will make up a larger fraction of the  
365 total DNA in samples with very little total DNA.



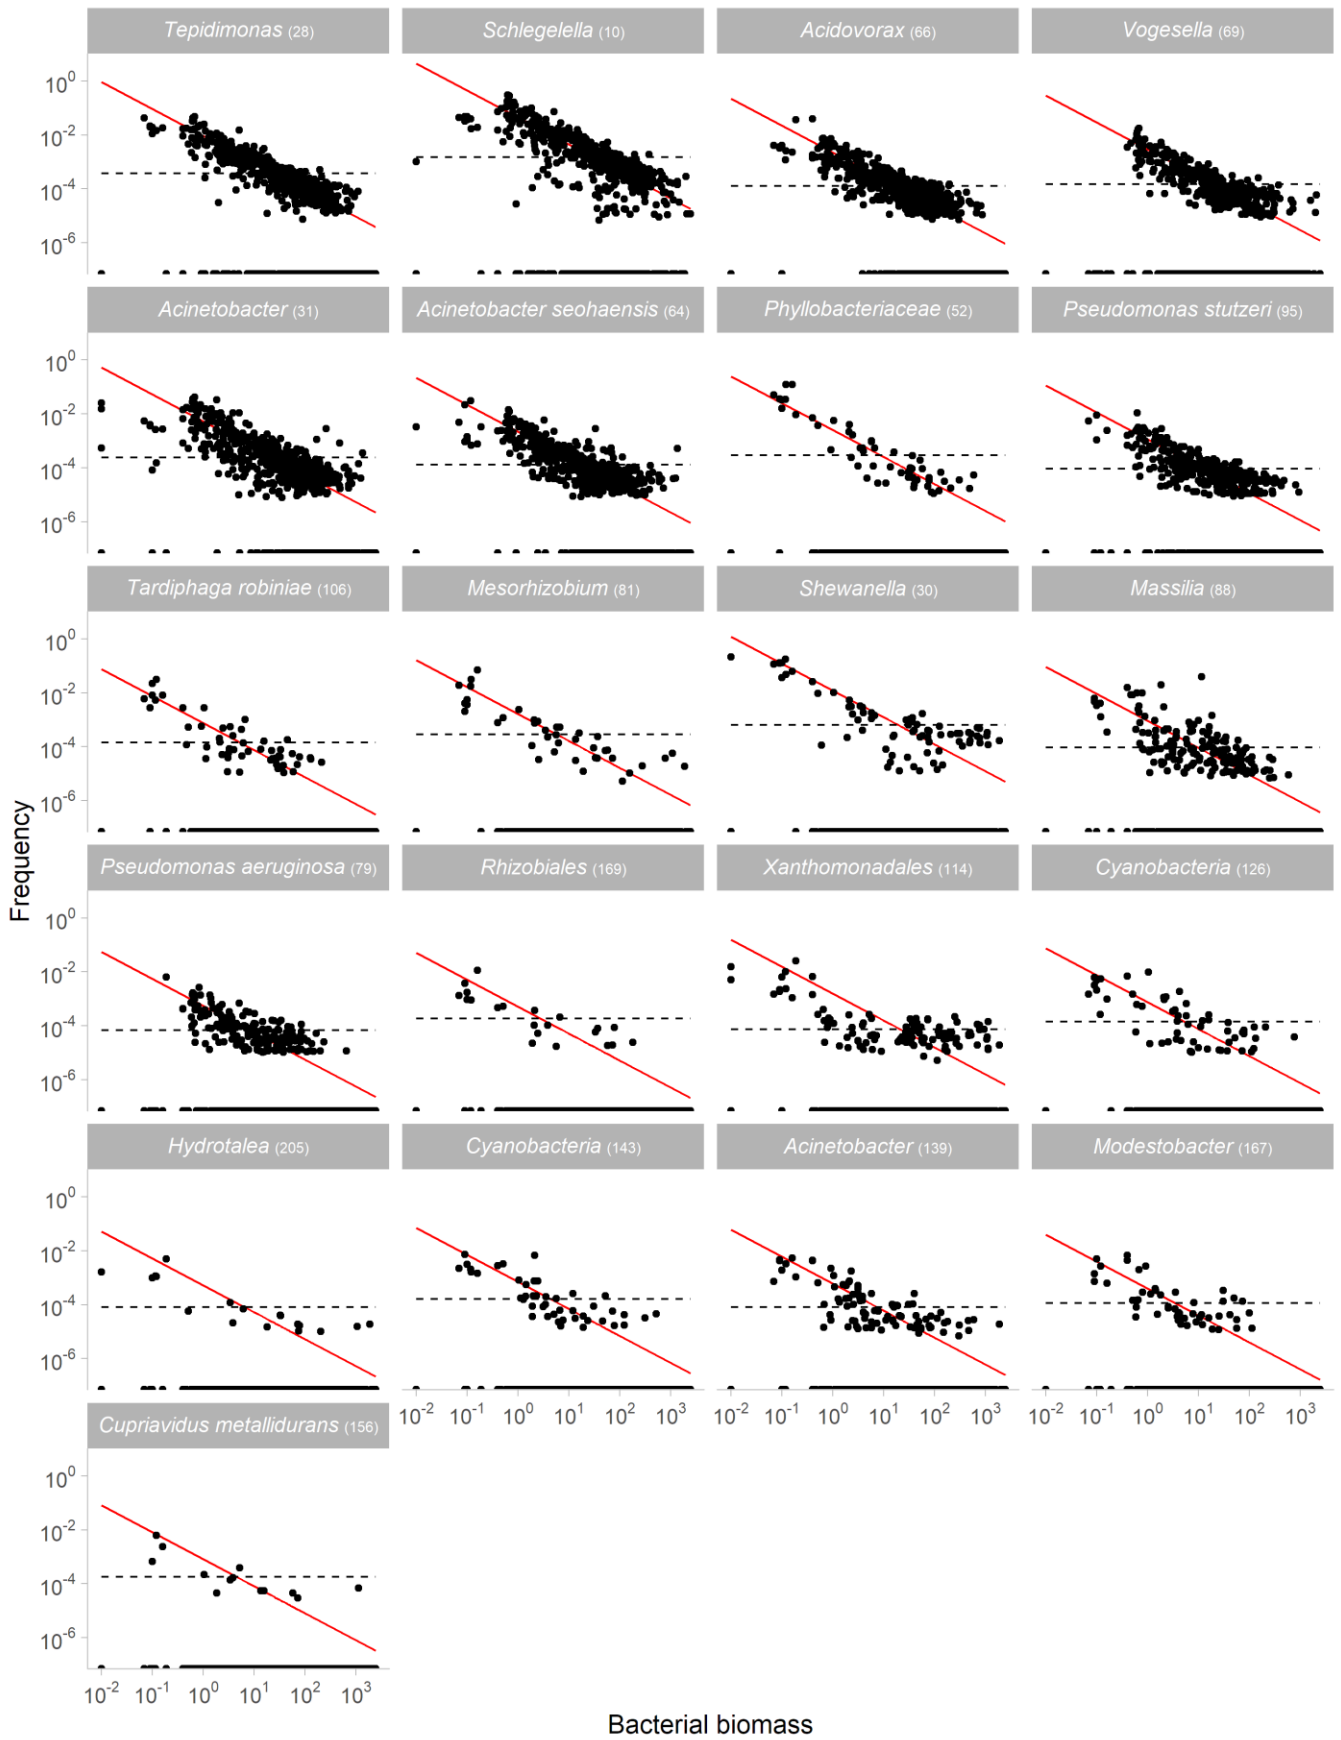

## References

- 368 1 Liu L, Oza S, Hogan D, *et al.* Global, regional, and national causes of under-5 mortality in 2000–15: an  
 369 updated systematic analysis with implications for the Sustainable Development Goals. *Lancet* 2016; **388**:  
 370 3027–35.
- 371 2 Global Burden of Disease Study 2013 Collaborators. Global, regional, and national incidence, prevalence,  
 372 and years lived with disability for 301 acute and chronic diseases and injuries in 188 countries, 1990–2013: a  
 373 systematic analysis for the Global Burden of Disease Study 2013. *Lancet* 2015; **386**: 743–800.
- 374 3 Rudan I. Epidemiology and etiology of childhood pneumonia. *Bull World Health Organ* 2008; **86**: 408–16.
- 375 4 Jackson S, Mathews KH, Pulanic D, *et al.* Risk factors for severe acute lower respiratory infections in  
 376 children: a systematic review and meta-analysis. *Croat Med J* 2013; **54**: 110–21.
- 377 5 Tsolia MN, Psarras S, Bossios A, *et al.* Etiology of Community-Acquired Pneumonia in Hospitalized School-  
 378 Age Children: Evidence for High Prevalence of Viral Infections. *Clin Infect Dis* 2004; **39**: 681–6.
- 379 6 Michelow IC, Olsen K, Lozano J, *et al.* Epidemiology and clinical characteristics of community-acquired  
 380 pneumonia in hospitalized children. *Pediatrics* 2004; **113**: 701–7.
- 381 7 Man WH, de Steenhuijsen Piters WAA, Bogaert D. The microbiota of the respiratory tract: gatekeeper to  
 382 respiratory health. *Nat Rev Microbiol* 2017; **15**: 259–70.
- 383 8 Teo SM, Mok D, Pham K, *et al.* The infant nasopharyngeal microbiome impacts severity of lower respiratory  
 384 infection and risk of asthma development. *Cell Host Microbe* 2015; **17**: 704–15.
- 385 9 Biesbroek G, Tsvitvadze E, Sanders EAM, *et al.* Early Respiratory Microbiota Composition Determines  
 386 Bacterial Succession Patterns and Respiratory Health in Children. *Am J Respir Crit Care Med* 2014; **190**:  
 387 1283–92.
- 388 10 Bosch AATM, de Steenhuijsen Piters WAA, van Houten MA, *et al.* Maturation of the Infant Respiratory  
 389 Microbiota, Environmental Drivers, and Health Consequences. A Prospective Cohort Study. *Am J Respir Crit*  
 390 *Care Med* 2017; **196**: 1582–90.
- 391 11 Laufer AS, Metlay JP, Gent JF, Fennie KP, Kong Y, Pettigrew MM. Microbial communities of the upper  
 392 respiratory tract and otitis media in children. *MBio* 2011; **2**: e00245-10.
- 393 12 Pettigrew MM, Laufer AS, Gent JF, Kong Y, Fennie KP, Metlay JP. Upper respiratory tract microbial  
 394 communities, acute otitis media pathogens, and antibiotic use in healthy and sick children. *Appl Environ*  
 395 *Microbiol* 2012; **78**: 6262–70.
- 396 13 De Steenhuijsen Piters WAA, Heinonen S, Hasrat R, *et al.* Nasopharyngeal microbiota, host transcriptome,  
 397 and disease severity in children with respiratory syncytial virus infection. *Am J Respir Crit Care Med* 2016;  
 398 **194**: 1104–15.
- 399 14 WHO. IMCI chart booklet. World Health Organization, 2014.
- 400 15 Scott JAG, Wonodi C, Moïsi JC, *et al.* The definition of pneumonia, the assessment of severity, and clinical  
 401 standardization in the Pneumonia Etiology Research for Child Health study. *Clin Infect Dis* 2012; **54 Suppl**  
 402 **2**: S109-16.
- 403 16 Marsh RL, Kaestli M, Chang AB, *et al.* The microbiota in bronchoalveolar lavage from young children with  
 404 chronic lung disease includes taxa present in both the oropharynx and nasopharynx. *Microbiome* 2016; **4**: 37.
- 405 17 van de Pol AC, Wolfs TFW, van Loon AM, *et al.* Molecular quantification of respiratory syncytial virus in  
 406 respiratory samples: reliable detection during the initial phase of infection. *J Clin Microbiol* 2010; **48**: 3569–  
 407 74.
- 408 18 Perkins SM, Webb DL, Torrance SA, *et al.* Comparison of a Real-Time Reverse Transcriptase PCR Assay  
 409 and a Culture Technique for Quantitative Assessment of Viral Load in Children Naturally Infected with  
 410 Respiratory Syncytial Virus. *J Clin Microbiol* 2005; **43**: 2356–62.
- 411 19 Bassis CM, Erb-Downward JR, Dickson RP, *et al.* Analysis of the Upper Respiratory Tract Microbiotas as  
 412 the Source of the Lung and Gastric Microbiotas in Healthy Individuals. *MBio* 2015; **6**: e00037-15.
- 413 20 Dickson RP, Erb-Downward JR, Freeman CM, *et al.* Bacterial Topography of the Healthy Human Lower  
 414 Respiratory Tract. *MBio* 2017; **8**: e02287-16.
- 415 21 Rhedin S, Lindstrand A, Hjelmgren A, *et al.* Respiratory viruses associated with community-acquired  
 416 pneumonia in children: matched case–control study. *Thorax* 2015; **70**: 847–53.
- 417 22 Jain S, Williams DJ, Arnold SR, *et al.* Community-Acquired Pneumonia Requiring Hospitalization among  
 418 U.S. Children. *N Engl J Med* 2015; **372**: 835–45.
- 419 23 Dickson RP, Erb-Downward JR, Huffnagle GB. Towards an ecology of the lung: New conceptual models of  
 420 pulmonary microbiology and pneumonia pathogenesis. *Lancet Respir Med* 2014; **2**: 238–46.
- 421 24 Said HS, Suda W, Nakagome S, *et al.* Dysbiosis of Salivary Microbiota in Inflammatory Bowel Disease and

Its Association With Oral Immunological Biomarkers. *DNA Res* 2014; **21**: 15–25.

- 25 Larsen JM. The immune response to Prevotella bacteria in chronic inflammatory disease. *Immunology* 2017; **151**: 363–74.
- 26 Marks LR, Davidson BA, Knight PR, Hakansson AP. Interkingdom signaling induces Streptococcus pneumoniae biofilm dispersion and transition from asymptomatic colonization to disease. *MBio* 2013; **4**: e00438-13.
- 27 O'Donnell PM, Aviles H, Lyte M, Sonnenfeld G. Enhancement of in vitro growth of pathogenic bacteria by norepinephrine: importance of inoculum density and role of transferrin. *Appl Environ Microbiol* 2006; **72**: 5097–9.
- 28 Clarke MB, Hughes DT, Zhu C, Boedeker EC, Sperandio V. The QseC sensor kinase: A bacterial adrenergic receptor. *Proc Natl Acad Sci* 2006; **103**: 10420–5.
- 29 Sakwinska O, Schmid VB, Berger B, et al. Nasopharyngeal microbiota in healthy children and pneumonia patients. *J Clin Microbiol* 2014; **52**: 1590–4.
- 30 Pettigrew MM, Gent JF, Kong Y, et al. Association of sputum microbiota profiles with severity of community-acquired pneumonia in children. *BMC Infect Dis* 2016; **16**: 317.
- 31 Biesbroek G, Bosch AATM, Wang X, et al. The Impact of Breastfeeding on Nasopharyngeal Microbial Communities in Infants. *Am J Respir Crit Care Med* 2014; **190**: 140612135546007.
- 32 Brook I. Prevotella and Porphyromonas infections in children. *J Med Microbiol* 1995; **42**: 340–7.
- 33 Prevaes SMPJ, de Winter-de Groot KM, Janssens HM, et al. Development of the Nasopharyngeal Microbiota in Infants with Cystic Fibrosis. *Am J Respir Crit Care Med* 2016; **193**: 504–15.
- 34 Ramsey MM, Freire MO, Gabriliska RA, Rumbaugh KP, Lemon KP. Staphylococcus aureus Shifts toward Commensalism in Response to Corynebacterium Species. *Front Microbiol* 2016; **7**: 1230.
- 35 Bomar L, Brugger SD, Yost BH, Davies SS, Lemon KP. Corynebacterium accolens Releases Antipneumococcal Free Fatty Acids from Human Nostril and Skin Surface Triacylglycerols. *MBio* 2016; **7**: e01725-15.
- 36 Pendleton KM, Erb-Downward JR, Bao Y, et al. Rapid Pathogen Identification in Bacterial Pneumonia Using Real-Time Metagenomics. *Am J Respir Crit Care Med* 2017; **196**: 1610–2.
- 37 Bosch AATM, Levin E, van Houten MA, et al. Development of Upper Respiratory Tract Microbiota in Infancy is Affected by Mode of Delivery. *EBioMedicine* 2016; **9**: 336–45.
- 38 Luna PN, Hasegawa K, Ajami NJ, et al. The association between anterior nares and nasopharyngeal microbiota in infants hospitalized for bronchiolitis. *Microbiome* 2018; **6**: 2.
- 39 Salter SJ, Turner C, Watthanaworawit W, et al. A longitudinal study of the infant nasopharyngeal microbiota: The effects of age, illness and antibiotic use in a cohort of South East Asian children. *PLoS Negl Trop Dis* 2017; **11**: e0005975.
- 40 Kanmani P, Clua P, Vizoso-Pinto MG, et al. Respiratory Commensal Bacteria Corynebacterium pseudodiphtheriticum Improves Resistance of Infant Mice to Respiratory Syncytial Virus and Streptococcus pneumoniae Superinfection. *Front Microbiol* 2017; **8**: 1613.
- 41 Eggleston PA, Ward BH, Pierson WE, Bierman CW. Radiographic abnormalities in acute asthma in children. *Pediatrics* 1974; **54**: 442–9.
- 42 Domínguez J, Blanco S, Rodrigo C, et al. Usefulness of urinary antigen detection by an immunochromatographic test for diagnosis of pneumococcal pneumonia in children. *J Clin Microbiol* 2003; **41**: 2161–3.
- 43 Bosch AATM, Biesbroek G, Trzcinski K, Sanders EAM, Bogaert D. Viral and bacterial interactions in the upper respiratory tract. *PLoS Pathog* 2013; **9**: e1003057.
- 44 Hasegawa K, Mansbach JM, Ajami NJ, et al. Association of nasopharyngeal microbiota profiles with bronchiolitis severity in infants hospitalised for bronchiolitis. *Eur Respir J* 2016; **48**: 1329–39.
- 45 Beigelman A, Bacharier LB. Early-life respiratory infections and asthma development. *Curr Opin Allergy Clin Immunol* 2016; **16**: 172–8.
- 46 Bogaert D, Keijser B, Huse S, et al. Variability and Diversity of Nasopharyngeal Microbiota in Children: A Metagenomic Analysis. *PLoS One* 2011; **6**: e17035.
- 47 Yatsunenko T, Rey FE, Manary MJ, et al. Human gut microbiome viewed across age and geography. *Nature* 2012; **486**: 222–7.
- 48 Markle JGM, Frank DN, Mortin-Toth S, et al. Sex Differences in the Gut Microbiome Drive Hormone-Dependent Regulation of Autoimmunity. *Science* 2013; **339**: 1084–8.
- 49 Mueller S, Saunier K, Hanisch C, et al. Differences in Fecal Microbiota in Different European Study Populations in Relation to Age, Gender, and Country: a Cross-Sectional Study. *Appl Environ Microbiol* 2006; **72**: 1027–33.

- 479 50 Pillet S, Lardeux M, Dina J, *et al.* Comparative Evaluation of Six Commercialized Multiplex PCR Kits for  
480 the Diagnosis of Respiratory Infections. *PLoS One* 2013; **8**: e72174.
- 481 51 Carvalho M da GS, Tondella ML, McCaustland K, *et al.* Evaluation and improvement of real-time PCR assays  
482 targeting *lytA*, *ply*, and *psaA* genes for detection of pneumococcal DNA. *J Clin Microbiol* 2007; **45**: 2460–  
483 6.
- 484 52 Wyllie AL, Chu MLJN, Schellens MHB, *et al.* *Streptococcus pneumoniae* in saliva of Dutch primary school  
485 children. *PLoS One* 2014; **9**: e102045.
- 486 53 Joshi N, Fass J. Sickle: A sliding-window, adaptive, quality-based trimming tool for FastQ files (Version  
487 1.33) [Software]. 2011. <https://github.com/najoshi/sickle>.
- 488 54 Nikolenko SI, Korobeynikov AI, Alekseyev MA. BayesHammer: Bayesian clustering for error correction in  
489 single-cell sequencing. *BMC Genomics* 2013; **14**: S7.
- 490 55 Masella AP, Bartram AK, Truszkowski JM, Brown DG, Neufeld JD. PANDAseq: paired-end assembler for  
491 illumina sequences. *BMC Bioinformatics* 2012; **13**: 31.
- 492 56 Caporaso JG, Kuczynski J, Stombaugh J, *et al.* QIIME allows analysis of high-throughput community  
493 sequencing data. *Nat Methods* 2010; **7**: 335–6.
- 494 57 Edgar RC, Haas BJ, Clemente JC, Quince C, Knight R. UCHIME improves sensitivity and speed of chimera  
495 detection. *Bioinformatics* 2011; **27**: 2194–200.
- 496 58 Rognes T, Mahé F, Flouri T, Quince C, Nichols B. VSEARCH. 2014. <https://github.com/torognes/vsearch>.
- 497 59 Westcott SL, Schloss PD. De novo clustering methods outperform reference-based methods for assigning 16S  
498 rRNA gene sequences to operational taxonomic units. *PeerJ* 2015; **3**: e1487.
- 499 60 Quast C, Pruesse E, Yilmaz P, *et al.* The SILVA ribosomal RNA gene database project: improved data  
500 processing and web-based tools. *Nucleic Acids Res* 2012; **41**: D590–6.
- 501 61 Caporaso JG, Bittinger K, Bushman FD, DeSantis TZ, Andersen GL, Knight R. PyNAST: a flexible tool for  
502 aligning sequences to a template alignment. *Bioinformatics* 2010; **26**: 266–7.
- 503 62 Price MN, Dehal PS, Arkin AP. FastTree 2--approximately maximum-likelihood trees for large alignments.  
504 *PLoS One* 2010; **5**: e9490.
- 505 63 Good IJ. The Population Frequencies of Species and the Estimation of Population Parameters. *Biometrika*  
506 1953; **40**: 237–64.
- 507 64 Subramanian S, Huq S, Yatsunenko T, *et al.* Persistent gut microbiota immaturity in malnourished  
508 Bangladeshi children. *Nature* 2014; **510**: 417.
- 509 65 Paulson JN, Stine OC, Bravo HC, Pop M. Differential abundance analysis for microbial marker-gene surveys.  
510 *Nat Methods* 2013; **10**: 1200–2.
- 511 66 Anderson MJ, Crist TO, Chase JM, *et al.* Navigating the multiple meanings of  $\beta$  diversity: a roadmap for the  
512 practicing ecologist. *Ecol Lett* 2011; **14**: 19–28.
- 513 67 Team RC. R: A Language and Environment for Statistical Computing. 2015.
- 514 68 Wickham HEG for DA. ggplot2: Elegant Graphics for Data Analysis. New York, NY: Springer-Verlag New  
515 York, 2009 DOI:10.1007/978-0-387-98141-3.
- 516 69 Legendre P, Anderson MJ, Egendree PIL. Distance-Based Redundancy Analysis: Testing Multispecies  
517 Responses in Multifactorial Ecological Experiments. *Ecol. Monogr.* 1999; **69**: 1–24.
- 518 70 Blanchet FG, Legendre P, Borcard D. Forward selection of explanatory variables. *Ecology* 2008; **89**: 2623–  
519 32.
- 520 71 Genuer R, Poggi J-M, Tuleau-Malot C. Variable selection using random forests. *Pattern Recognit Lett* 2010;  
521 **31**: 2225–36.
- 522 72 Liaw A, Wiener M. Classification and Regression by randomForest. *R News* 2002; **2**: 18–22.
- 523 73 Kuhn M. Building Predictive Models in R Using the caret Package. *J Stat Softw* 2008; **28**: 1–26.
- 524 74 Robin X, Turck N, Hainard A, *et al.* pROC: an open-source package for R and S+ to analyze and compare  
525 ROC curves. *BMC Bioinformatics* 2011; **12**: 77.
- 526 75 Vatanen T, Kostic AD, D’Hennezel E, *et al.* Variation in Microbiome LPS Immunogenicity Contributes to  
527 Autoimmunity in Humans. *Cell* 2016; **165**: 842–53.
- 528
